# Supplementary material for: The fossil Osmundales (Royal Ferns)—a phylogenetic network analysis, revised taxonomy, and evolutionary classification of anatomically preserved trunks and rhizomes
Source: PeerJ. 2017 Jul 11;5:e3433. doi: 10.7717/peerj.3433 (PMC5508817; doi:10.7717/peerj.3433)
Supplement: Supplemental Information 9 [file peerj-05-3433-s009.xlsx]

## Sheet: DistOverview
Results of the Dist_Stats analysis. Matrix-related values
Filename	S00_Osmales.mean.dst
Matrix number	1
Quartets examined	8783390
Fraction examined	1
Sum of squares [SoS]	950.38
Maximum distance	0.807692
Delta value	0.375656
Epsilon value	0.375661
Non-additivity	7.95565
Additivity	24.9703
Squared R/Q difference	20.002
Absolute mean Q [AMQ]	0.0636056
Rescaled mean Q [RMQ]	0.0787498
Q per SoS2	18122.1
Absolute mean R [AMR]	0.214845
Rescaled mean R [RMR]	0.265999
R per SoS2	61212.3

## Sheet: S00
Full results of the Dist_Stats taxon-wise analysis of matrix S00. 287980 quartets examined for each taxon.
Abbrev.: DV = Delta value; EV = Epsilon values (DV corrected for dimension effects, see Auch et al. 2006); AMQ, RMQ, AMR, RMR = alternative measures not considered here (see first sheet)
Taxon (subgenus)	Alternative name	Systematics	Time period	Prop. missing	DV	EV	AMQ	RMQ	AMR	RMR	Included also in matrices
Osmunda lancea	[n/a]	Osmundaceae:~oideae:~eae:~inae	Extant	0.0222222	0.36849	0.368493	0.0516972	0.0640061	0.18574	0.229964
Osmunda iliaensis	[n/a]	Osmundaceae:~oideae:~eae:~inae	Neogene	0.0222222	0.374391	0.374394	0.054643	0.0676532	0.191505	0.237101
Claytosmunda claytoniana	Osmunda ~	Osmundaceae:~oideae:~eae:~inae	Extant	0.0222222	0.375133	0.375137	0.0548261	0.0678799	0.194535	0.240853
Osmunda japonica	[n/a]	Osmundaceae:~oideae:~eae:~inae	Extant	0.0222222	0.378722	0.378725	0.0543303	0.0672661	0.185868	0.230122
Plenasium (Plenasium) bromeliifolia	Osmunda ~	Osmundaceae:~oideae:~eae:~inae	Extant	0.0222222	0.383336	0.383346	0.0625079	0.0773907	0.195985	0.242648
Claytosmunda johnstonii	Osmunda ~	Osmundaceae:~oideae:~eae:~inae	?	0.0222222	0.389533	0.389536	0.0560282	0.0693682	0.186581	0.231005
Plenasium (Plenasium) javanica	Osmunda ~	Osmundaceae:~oideae:~eae:~inae	Extant	0.0222222	0.38971	0.389717	0.0619492	0.076699	0.193005	0.238958
Claytosmunda wehrii	Osmunda ~	Osmundaceae:~oideae:~eae:~inae	Neogene	0.0222222	0.39081	0.390831	0.0557967	0.0690816	0.183074	0.226663
Osmunda regalis	[n/a]	Osmundaceae:~oideae:~eae:~inae	Extant	0.0222222	0.392598	0.392602	0.0573045	0.0709485	0.183987	0.227794
Claytosmunda liaoningensis	Osmunda ~	Osmundaceae:~oideae:~eae:~inae	Jurassic	0.0222222	0.402045	0.402056	0.057663	0.0713922	0.181947	0.225268
Claytosmunda chengii	Osmunda ~	Osmundaceae:~oideae:~eae:~inae	Jurassic	0.0222222	0.404155	0.404155	0.06035	0.0747191	0.188302	0.233136
Leptopteris hymenophylloides	[n/a]	Osmundaceae:~oideae:~eae:Todinae	Extant	0.0444444	0.367109	0.367172	0.0559012	0.069211	0.201254	0.249171
Leptopteris superba	[n/a]	Osmundaceae:~oideae:~eae:Todinae	Extant	0.0444444	0.367109	0.367172	0.0559012	0.069211	0.201254	0.249171
Osmundastrum pulchellum	Osmunda ~a	Osmundaceae:~oideae:~eae:~inae	Jurassic	0.0444444	0.375297	0.375318	0.054684	0.0677041	0.196319	0.243062
Plenasium (Plenasium) vachellii	Osmunda ~	Osmundaceae:~oideae:~eae:~inae	Extant	0.0444444	0.37707	0.377074	0.0639364	0.0791594	0.205584	0.254532
Plenasium dowkeri	Osmunda ~	Osmundaceae:~oideae:~eae:~inae	Paleogene	0.0444444	0.378599	0.378602	0.0671214	0.0831027	0.212421	0.262997
Plenasium (Plenasium) arnoldii	Osmunda ~	Osmundaceae:~oideae:~eae:~inae	Paleogene	0.0444444	0.37918	0.379191	0.0643146	0.0796276	0.204703	0.253441
Claytosmunda wangii	Osmunda ~	Osmundaceae:~oideae:~eae:~inae	Jurassic	0.0444444	0.379194	0.379215	0.0546971	0.0677202	0.189629	0.234778
Osmundastrum cinnamomeum	Osmunda ~a	Osmundaceae:~oideae:~eae:~inae	Extant	0.0444444	0.380254	0.380258	0.0594107	0.0735562	0.198879	0.246231
Plenasium (Plenasium) banksiifolia	Osmunda ~	Osmundaceae:~oideae:~eae:~inae	Extant	0.0444444	0.380458	0.380461	0.0620411	0.0768128	0.196583	0.243388
Leptopteris wilkesiana	[n/a]	Osmundaceae:~oideae:~eae:Todinae	Extant	0.0444444	0.382113	0.382162	0.0565104	0.0699653	0.189806	0.234998
Leptopteris fraseri	[n/a]	Osmundaceae:~oideae:~eae:Todinae	Extant	0.0444444	0.382353	0.382356	0.0578664	0.0716441	0.19714	0.244078
Claytosmunda plumites	Osmunda ~	Osmundaceae:~oideae:~eae:~inae	Jurassic	0.0444444	0.386012	0.38604	0.0601539	0.0744762	0.197987	0.245127
Osmunda shimokawaensis	[n/a]	Osmundaceae:~oideae:~eae:~inae	Neogene	0.0444444	0.387746	0.387749	0.0544117	0.0673669	0.181461	0.224666
Osmundastrum cinnamomea (Cretaceous, Canada)	Osmunda ~a	Osmundaceae:~oideae:~eae:~inae	Cretaceous	0.0444444	0.388945	0.388955	0.0632837	0.0783512	0.202453	0.250656
Osmunda pluma	[n/a]	Osmundaceae:~oideae:~eae:~inae	Paleogene	0.0444444	0.390281	0.390281	0.0583453	0.0722371	0.189562	0.234696
Osmundastrum precinnamomeum	Osmunda ~a	Osmundaceae:~oideae:~eae:~inae	Paleogene	0.0444444	0.397783	0.397786	0.0648015	0.0802304	0.199547	0.247058
Osmunda oregonensis	[n/a]	Osmundaceae:~oideae:~eae:~inae	Paleogene	0.0444444	0.401565	0.401565	0.0598067	0.0740464	0.18467	0.228639
Osmundastrum cinnamomeum (Neogene, USA)	Osmunda ~a	Osmundaceae:~oideae:~eae:~inae	Neogene	0.0666667	0.389581	0.389588	0.0628361	0.0777971	0.200281	0.247967
Claytosmunda sinica	Osmunda ~	Osmundaceae:~oideae:~eae:~inae	Jurassic	0.0666667	0.390237	0.390237	0.0582455	0.0721135	0.190702	0.236107
Osmundastrum embreei	Osmunda ~	Osmundaceae:~oideae:~eae:~inae	Cretaceous	0.0666667	0.396306	0.39631	0.0613462	0.0759524	0.192035	0.237758
Todea barbara	[n/a]	Osmundaceae:~oideae:~eae:Todinae	Extant	0.0666667	0.406382	0.406382	0.0682572	0.0845089	0.19954	0.247049
Osmundastrum indentatum	Osmunda ~a	Osmundaceae:~oideae:~eae:~inae	Triassic	0.0666667	0.414942	0.414942	0.0633638	0.0784505	0.181843	0.225139
Osmundacaulis pruchnickii	[n/a]	Osmundaceae:[unplaced]	Jurassic	0.111111	0.32508	0.32508	0.0649404	0.0804024	0.271174	0.33574
Osmundacaulis griggsii	[n/a]	Osmundaceae:[unplaced]	Jurassic	0.111111	0.326594	0.326594	0.0668184	0.0827276	0.277493	0.343562
Osmundacaulis jonesii	[n/a]	Osmundaceae:[unplaced]	Jurassic	0.111111	0.333584	0.333584	0.0646713	0.0800692	0.26113	0.323303
Millerocaulis swanensis	[n/a]	Osmundaceae:Osmundoideae	Jurassic	0.111111	0.374204	0.374211	0.054218	0.0671271	0.194117	0.240335
Plenasium (Aurealcaulis) burgii	Osmunda ~	Osmundaceae:~oideae:~eae:~inae	Cretaceous	0.111111	0.378518	0.378518	0.062062	0.0768387	0.200592	0.248352
Millerocaulis rajmahalensis	[n/a]	Osmundaceae:Osmundoideae	Cretaceous	0.111111	0.379695	0.379709	0.0521609	0.0645801	0.181437	0.224636
Millerocaulis richmondii	[n/a]	Osmundaceae:Osmundoideae	Jurassic	0.111111	0.388712	0.388715	0.0565917	0.0700659	0.186381	0.230757
Claytosmunda preosmunda	Osmunda ~	Osmundaceae:~oideae:~eae:~inae	Jurassic	0.111111	0.39526	0.39526	0.0621375	0.0769322	0.194168	0.240398
Millerocaulis broganii	[n/a]	Osmundaceae:Osmundoideae	Jurassic	0.111111	0.401557	0.401567	0.0550475	0.068154	0.172343	0.213377
Osmundacaulis skidegatensis	[n/a]	Osmundaceae:[unplaced]	Cretaceous	0.133333	0.308603	0.308607	0.064269	0.0795712	0.288486	0.357173
Osmundacaulis nerii	[n/a]	Osmundaceae:[unplaced]	Jurassic	0.133333	0.322491	0.322498	0.0663899	0.0821971	0.277422	0.343475
Osmundacaulis richmondii	[n/a]	Osmundaceae:[unplaced]	Jurassic	0.133333	0.324514	0.324525	0.0653619	0.0809242	0.268833	0.332841
Osmundacaulis hoskingii var. hoskingii	[n/a]	Osmundaceae:[unplaced]	Jurassic	0.133333	0.329325	0.329336	0.0672471	0.0832584	0.275773	0.341433
Osmundacaulis tehuelchensis	[n/a]	Osmundaceae:[unplaced]	Jurassic	0.133333	0.348687	0.348687	0.0646909	0.0800935	0.235922	0.292094
Osmundastrum cinnamomeum (Neogene, Japan)	Osmunda ~a	Osmundaceae:~oideae:~eae:~inae	Neogene	0.133333	0.368191	0.368191	0.0595419	0.0737185	0.213257	0.264032
Plenasium (Aurealcaulis) moorei	Osmunda ~	Osmundaceae:~oideae:~eae:~inae	Paleogene	0.133333	0.387905	0.387905	0.0664645	0.0822894	0.199121	0.246531
Millerocaulis wadei	[n/a]	Osmundaceae:Osmundoideae	Jurassic	0.133333	0.403954	0.403957	0.0541588	0.0670537	0.169058	0.20931
Palaeosmunda williamsii	[n/a]	Osmundaceae:Osmundoideae	Permian	0.133333	0.404793	0.404793	0.0647817	0.0802059	0.184087	0.227918
Millerocaulis gibbianus	[n/a]	Osmundaceae:Osmundoideae	Jurassic	0.133333	0.412395	0.412395	0.064322	0.0796368	0.186837	0.231322
Claytosmunda tekelili	Osmunda ~	Osmundaceae:~oideae:~eae:~inae	Cretaceous	0.133333	0.421044	0.421048	0.0617286	0.0764259	0.172601	0.213696
Osmundacaulis tasmanensis	[n/a]	Osmundaceae:[unplaced]	Jurassic	0.155556	0.32475	0.32475	0.0658162	0.0814868	0.270865	0.335356
Osmundacaulis andrewii	[n/a]	Osmundaceae:[unplaced]	Jurassic	0.155556	0.346266	0.346273	0.0677491	0.0838798	0.250016	0.309544
Thamnopteris kidstonii	[n/a]	Osmundaceae:Thamnopterioideae	Permian	0.155556	0.349358	0.349358	0.072535	0.0898052	0.265885	0.329191	S03/S04
Plenasium (Aurealcaulis) dakotensis	Osmunda ~	Osmundaceae:~oideae:~eae:~inae	Cretaceous	0.155556	0.373933	0.373933	0.0666497	0.0825187	0.21352	0.264358
Plenasium (Aurealcaulis) nebraskensis	Osmunda ~	Osmundaceae:~oideae:~eae:~inae	Cretaceous	0.155556	0.3758	0.3758	0.0636669	0.0788257	0.204496	0.253186
Millerocaulis wrightii	[n/a]	Osmundaceae:Osmundoideae	Jurassic	0.155556	0.380786	0.380786	0.0542693	0.0671906	0.183745	0.227493
Millerocaulis aucklandicus	[n/a]	Osmundaceae:Osmundoideae	Jurassic	0.155556	0.384985	0.385009	0.0555753	0.0688075	0.185541	0.229718
Millerocaulis amarjolensis	[n/a]	Osmundaceae:Osmundoideae	Cretaceous	0.155556	0.386376	0.38638	0.0528149	0.0653899	0.178416	0.220896
Millerocaulis beipiaoensis	[n/a]	Osmundaceae:Osmundoideae	Jurassic	0.155556	0.3873	0.3873	0.0528251	0.0654025	0.177258	0.219463
Millerocaulis websteri	[n/a]	Osmundaceae:Osmundoideae	Jurassic	0.155556	0.388072	0.388072	0.0561128	0.0694729	0.185082	0.229149
Millerocaulis woolfei	[n/a]	Osmundaceae:Osmundoideae	Triassic	0.155556	0.39544	0.39546	0.0547277	0.067758	0.177157	0.219337
Millerocaulis livingstonensis	[n/a]	Osmundaceae:Osmundoideae	Cretaceous	0.155556	0.398929	0.398953	0.0559948	0.0693269	0.178167	0.220587
Millerocaulis patagonicus	[n/a]	Osmundaceae:Osmundoideae	Jurassic	0.155556	0.403986	0.403986	0.05936	0.0734933	0.180303	0.223232
Claytosmunda beardmorensis	Osmunda ~	Osmundaceae:~oideae:~eae:~inae	Triassic	0.155556	0.405282	0.405282	0.0648058	0.0802358	0.202455	0.250658
Millerocaulis kolbei	[n/a]	Osmundaceae:Osmundoideae	Cretaceous	0.155556	0.415102	0.415102	0.068813	0.085197	0.186397	0.230777
Osmundacaulis whittlesii	[n/a]	Osmundaceae:[unplaced]	Cretaceous	0.177778	0.319928	0.319928	0.0653418	0.0808994	0.27558	0.341195
Osmundacaulis zululandensis	[n/a]	Osmundaceae:[unplaced]	?	0.177778	0.337891	0.337891	0.0694049	0.0859299	0.268941	0.332974
Osmundacaulis lemonii	[n/a]	Osmundaceae:[unplaced]	Jurassic	0.177778	0.343156	0.343156	0.0676232	0.0837239	0.249453	0.308847
Plenasium (Aurealcaulis) crossii	Osmunda ~	Osmundaceae:~oideae:~eae:~inae	Paleogene	0.177778	0.373642	0.373642	0.064016	0.0792579	0.205843	0.254854
Plenasium (Aurealcaulis) bransonii	Osmunda ~	Osmundaceae:~oideae:~eae:~inae	Paleogene	0.177778	0.374302	0.374305	0.0682987	0.0845603	0.217233	0.268955
Plenasium chandleri	Osmunda ~	Osmundaceae:~oideae:~eae:~inae	Paleogene	0.177778	0.385962	0.385962	0.069541	0.0860984	0.211164	0.261442
Millerocaulis hebeiensis	[n/a]	Osmundaceae:Osmundoideae	Jurassic	0.177778	0.388753	0.388757	0.0547256	0.0677555	0.182248	0.22564
Millerocaulis sahnii	[n/a]	Osmundaceae:Osmundoideae	Cretaceous	0.177778	0.38936	0.389367	0.0549164	0.0679918	0.182179	0.225555
Millerocaulis australis	[n/a]	Osmundaceae:Osmundoideae	Cretaceous	0.177778	0.389655	0.389655	0.0535623	0.0663152	0.177944	0.220312
Millerocaulis spinksii	[n/a]	Osmundaceae:Osmundoideae	Jurassic	0.177778	0.404271	0.404278	0.0594026	0.0735461	0.178942	0.221547
Palaeosmunda playfordii	[n/a]	Osmundaceae:Osmundoideae	Permian	0.177778	0.413205	0.413208	0.0587472	0.0727346	0.1732	0.214438
Osmundacaulis natalensis	[n/a]	Osmundaceae:[unplaced]	Cretaceous	0.2	0.31016	0.31016	0.0635101	0.0786315	0.280103	0.346794
Thamnopteris schlechtendalii	[n/a]	Osmundaceae:Thamnopterioideae	Permian	0.2	0.336404	0.336404	0.0705011	0.0872871	0.272247	0.337068	S03/S04
Osmundacaulis tidwellii	[n/a]	Osmundaceae:[unplaced]	?	0.2	0.348243	0.348243	0.0674906	0.0835598	0.241816	0.299392
Millerocaulis donponii	[n/a]	Osmundaceae:Osmundoideae	Jurassic	0.2	0.394562	0.394562	0.0597504	0.0739767	0.186769	0.231237
Millerocaulis juandahensis	[n/a]	Osmundaceae:Osmundoideae	Jurassic	0.2	0.39798	0.397984	0.0588516	0.0728639	0.183569	0.227276
Millerocaulis limewoodensis	[n/a]	Osmundaceae:Osmundoideae	Jurassic	0.2	0.401509	0.401512	0.061382	0.0759967	0.188482	0.233359
Millerocaulis macromedullosus	[n/a]	Osmundaceae:Osmundoideae	Jurassic	0.2	0.405329	0.405329	0.0595211	0.0736929	0.176706	0.218778
Osmundacaulis atherstonei	[n/a]	Osmundaceae:[unplaced]	Cretaceous	0.222222	0.315583	0.315583	0.0644929	0.0798483	0.275744	0.341397
Thamnopteris javorskii	[n/a]	Osmundaceae:Thamnopterioideae	Permian	0.222222	0.366801	0.366801	0.0697406	0.0863455	0.242936	0.300777	S03/S04
Lunea jonesii	[n/a]	Guaireaceae:Guaireoideae	Jurassic	0.222222	0.392682	0.392682	0.074491	0.092227	0.225296	0.278938
Millerocaulis dunlopii	[n/a]	Osmundaceae:Osmundoideae	Jurassic	0.222222	0.393932	0.393932	0.0603318	0.0746966	0.190943	0.236406
Millerocaulis guptai	[n/a]	Osmundaceae:Osmundoideae	Cretaceous	0.222222	0.401642	0.401642	0.0570258	0.0706034	0.176441	0.218451
Millerocaulis chubutensis	[n/a]	Osmundaceae:Osmundoideae	Jurassic	0.222222	0.405338	0.405338	0.0639297	0.079151	0.189765	0.234947
Osmundacaulis bamfordiae	[n/a]	Osmundaceae:[unplaced]	?	0.244444	0.364899	0.364902	0.0695632	0.0861258	0.239689	0.296758
Millerocaulis indica	[n/a]	Osmundaceae:Osmundoideae	Cretaceous	0.244444	0.391121	0.391125	0.0644416	0.0797848	0.201781	0.249824
Todea tidwellii	[n/a]	Osmundaceae:~oideae:~eae:Todinae	Cretaceous	0.244444	0.415807	0.415807	0.0636365	0.0787881	0.181937	0.225255
Thamnopteris gwynnevaughanii	[n/a]	Osmundaceae:Thamnopterioideae	Permian	0.266667	0.322968	0.322975	0.0701903	0.0869023	0.287724	0.35623	S03/S04
Chasmatopteris principalis	[n/a]	Osmundaceae:Thamnopterioideae	Permian	0.266667	0.372936	0.372936	0.0709461	0.0878381	0.226942	0.280976	S03/S04
Grammatocaulis donponii	[n/a]	Potential sistergroup of Osmundales	Jurassic	0.266667	0.381551	0.381551	0.0739928	0.0916101	0.234605	0.290464
Thamnopteris splendida	[n/a]	Osmundaceae:Thamnopterioideae	Permian	0.288889	0.363009	0.363016	0.073186	0.0906112	0.257713	0.319074	S03/S04
?Leptopteris estipularis	[n/a]	Osmundaceae:~oideae:~eae:Todinae	Cretaceous	0.288889	0.386231	0.386234	0.0590141	0.0730651	0.195505	0.242054
Millerocaulis santaecrucis	[n/a]	Osmundaceae:Osmundoideae	Jurassic	0.311111	0.396547	0.396547	0.054297	0.0672248	0.174753	0.216361
Grammatopteris baldaufii	[n/a]	Potential sistergroup of Osmundales	Permian	0.333333	0.344277	0.344277	0.0723986	0.0896363	0.270774	0.335244
Grammatopteris freitasii	[n/a]	Potential sistergroup of Osmundales	Permian	0.333333	0.346932	0.346932	0.0750898	0.0929683	0.279716	0.346316
Grammatopteris rigollotii	[n/a]	Potential sistergroup of Osmundales	Permian	0.355556	0.34462	0.34462	0.0751837	0.0930846	0.282864	0.350213
Rastropteris pinquanensis	[n/a]	Potential sistergroup of Osmundales	Permian	0.355556	0.348928	0.348928	0.0735376	0.0910466	0.269863	0.334117
Bathypteris rhomboidea	[n/a]	Osmundaceae:[unplaced]	Permian	0.377778	0.356658	0.356662	0.0730079	0.0903907	0.254356	0.314917	S03/S04
Millerocaulis herbstii	[n/a]	Osmundaceae:Osmundoideae	Triassic	0.377778	0.426079	0.426083	0.0731951	0.0906225	0.19941	0.246889
Millerocaulis tuhajkulensis	[n/a]	Osmundaceae:Osmundoideae	Triassic	0.377778	0.426244	0.426248	0.0681223	0.0843419	0.182644	0.226131
Itopsidema vancleavei	[n/a]	Guaireaceae:Itopsidemoideae	Triassic	0.4	0.37265	0.37265	0.0768918	0.0951993	0.248681	0.307891
Millerocaulis lutziae	[n/a]	Osmundaceae:Osmundoideae	Triassic	0.4	0.406841	0.406844	0.0661206	0.0818636	0.19699	0.243893
'Millerocaulis' stipabonettiorum	Palaeosmunda ~a	Osmundaceae:Osmundoideae	Triassic	0.4	0.408201	0.408201	0.0675134	0.083588	0.19453	0.240846
Donwelliacaulis chlouberii	[n/a]	Guaireaceae:Itopsidemoideae	Triassic	0.422222	0.3492	0.3492	0.0838634	0.103831	0.294543	0.364672
Shuichengella primitiva	[n/a]	Guaireaceae:Guaireoideae	Permian	0.422222	0.37238	0.37238	0.0726051	0.089892	0.232419	0.287757
Tiania yunnanensis	[n/a]	Guaireaceae:Itopsidemoideae	Permian	0.444444	0.386917	0.386917	0.0750669	0.09294	0.225177	0.27879
Guairea millerii	[n/a]	Guaireaceae:Guaireoideae	Permian	0.444444	0.403444	0.403444	0.0779192	0.0964714	0.220187	0.272613
Guairea brasiliensis	[n/a]	Guaireaceae:Guaireoideae	Permian	0.466667	0.354648	0.354648	0.0826658	0.102348	0.282723	0.350038
Guairea carnierii	[n/a]	Guaireaceae:Guaireoideae	Permian	0.466667	0.364868	0.364868	0.0787457	0.0974947	0.25766	0.319007
Thamnopteris gracilis	[n/a]	Osmundaceae:Thamnopterioideae	Permian	0.533333	0.361967	0.361971	0.0757311	0.0937623	0.272075	0.336855	S03/S04
Thamnopteris uralica	[n/a]	Osmundaceae:Thamnopterioideae	Permian	0.533333	0.364169	0.364176	0.0734379	0.0909231	0.266896	0.330442	S03/S04
Zhongmingella plenasioides	[n/a]	Guaireaceae:Guaireoideae	Permian	0.533333	0.380793	0.380796	0.0829817	0.102739	0.253675	0.314074
Thamnopteris kazanensis	[n/a]	Osmundaceae:Thamnopterioideae	Permian	0.555556	0.360125	0.360128	0.0812444	0.100588	0.271183	0.33575	S03/S04
Thamnopteris diploxylon	[n/a]	Osmundaceae:Thamnopterioideae	Permian	0.555556	0.363713	0.363717	0.0762597	0.0944168	0.272491	0.337369	S03/S04
Claytosmunda nathorstii	Osmunda ~	Osmundaceae:~oideae:~eae:~inae	Paleogene	0.6	[N/A]	[N/A]	[N/A]	[N/A]	[N/A]	[N/A]
Osmundacaulis janae	[n/a]	Osmundaceae:[unplaced]	Jurassic	0.666667	[N/A]	[N/A]	[N/A]	[N/A]	[N/A]	[N/A]
Anomorrhoea fischeri	[n/a]	Osmundaceae:[unplaced]	Permian	0.688889	[N/A]	[N/A]	[N/A]	[N/A]	[N/A]	[N/A]
???? kidstonii	Osmunda ~	Osmundaceae:~oideae:~eae:~inae	Cretaceous	0.688889	[N/A]	[N/A]	[N/A]	[N/A]	[N/A]	[N/A]
Todea papuana	[n/a]	Osmundaceae:~oideae:~eae:Todinae	Extant	0.844444	[N/A]	[N/A]	[N/A]	[N/A]	[N/A]	[N/A]

## Sheet: DiffSupport
		S00			S03			S05			S08			S09
	Number of taxa	124			111			81			46			39
	Number of characters (= number of distinct alignment patterns)	45			40			33			31			29
	Proportion of ambiguous or undetermined characters	0.2036			0.1986			0.1579			0.0968			0.0946
Split (clade in accordingly rooted trees) [bold: supported by explicit phylogenetic analyses]	Here recognized as	ML	NJ	MP	ML	NJ	MP	ML	NJ	MP	ML	NJ	MP	ML	NJ	MP
Grammatopteris and relatives | Osmundales	Outgroup | ingroup	23.7	39.4	21	–	–	–	–	–	–	–	–	–	–	–	–
Grammatopteris + Rastropteris	[Not formalized]	93.9	95.9	83	–	–	–	–	–	–	–	–	–	–	–	–
Guaireaceae	Putatively holophyletic	<10	<10	<10	–	–	–	–	–	–	–	–	–	–	–	–
Guaireoideae	Holo- or paraphyletic	<10	<10	<10	–	–	–	–	–	–	–	–	–	–	–	–
Guairea	Likely holophyletic	45.4	41.5	42	–	–	–	–	–	–	–	–	–	–	–	–
Itopsidemoideae	Holo- or paraphyletic	42	46.5	32	–	–	–	–	–	–	–	–	–	–	–	–
Donwellia + Itopsidema	[Not formalized]	61.1	74.1	50	–	–	–	–	–	–	–	–	–	–	–	–
Guaireaceae + Osmundoideae	[Not recognized]	45.3	<10	<10	–	–	–	–	–	–	–	–	–	–	–	–
Guairea + Osmundacaulis	[Not recognized]	24.4	20.4	<10	–	–	–	–	–	–	–	–	–	–	–	–
Osmundaceae	Possibly paraphyletic	<10	<10	<10	–	–	–	–	–	–	–	–	–	–	–	–
Shuichengella + Osmundacaulis	Possibly holophyletic	<10	<10	<10	42.2	31.5	22.2	–	–	–	–	–	–	–	–	–
Osmundacaulis	Likely holophyletic	26.8	23.8	17	74.3	57.7	28.9	–	–	–	–	–	–	–	–	–
Thamnopterioideae	Holo- or paraphyletic	20.3	26.7	11.2	70.2	72.9	39.5	–	–	–	–	–	–	–	–	–
Osmundoideae	Putatively holophyletic	<10	<10	<10	<10	<10	<10	–	–	–	–	–	–	–	–	–
Palaeosmunda incl. 'Millerocaulis' stipabonettiorum	Possibly holophyletic	<10	<10	<10	<10	<10	<10	12.5	11.2	<10	–	–	–	–	–	–
Palaeosmunda (s.str.)	Likely holophyletic	32.4	27.7	16.9	48.1	34.8	18.8	55.2	41.9	25.3	–	–	–	–	–	–
P. playfordii + 'Millerocaulis' stipabonettiorum	[Possibly related]	10.5	11	<10	10.6	11.7	<10	10.7	15.4	<10	–	–	–	–	–	–
Osmundeae	Holophyletic	<10	<10	<10	<10	16.8	<10	<10	<10	<10	–	–	–	–	–	–
Millerocaulis	Holo- or paraphyletic	<10	<10	<10	<10	<10	<10	<10	<10	<10	–	–	–	–	–	–
Osmundinae	Holophyletic	<10	<10	<10	<10	<10	<10	<10	<10	<10	–	–	–	–	–	–
Osmundastrum (incl. Triassic O. indentatum)	Putatively holophyletic	<10	<10	<10	<10	<10	<10	<10	<10	<10	<10	<10	<10	<10	<10	<10
Modern Osmundastrum + O. pulchellum	Holophyletic	<10	10	<10	<10	10	<10	<10	10.2	<10	21.7	25.5	<10	21.5	26.5	<10
Modern Osmundastrum*	Likely holophyletic	24.7	30.3	10.4	23.8	30.1	10.1	28.3	32.2	<10	51	57.1	16	56	64.6	17.9
Claytosmunda + Osmunda + Plenasium	Holophyletic	<10	<10	<10	<10	<10	<10	<10	<10	<10	<10	<10	<10	–	–	–
Claytosmunda*	Paraphyletic	<10	<10	<10	<10	<10	<10	<10	<10	<10	<10	<10	<10	<10	<10	<10
Osmunda + Plenasium	Holophyletic	<10	<10	<10	<10	<10	<10	<10	<10	<10	<10	<10	<10	<10	<10	<10
Osmunda	Putatively holophyletic	<10	<10	<10	<10	<10	<10	<10	<10	<10	<10	<10	<10	<10	<10	<10
Extant Osmunda + O. iliaensis	[Not formalized]	12.6	<10	<10	12.3	<10	<10	11.1	<10	<10	28	29.6	<10	27.3	17.1	<10
Extant Osmunda	Likely holophyletic	29.1	<10	<10	27	<10	<10	27.5	<10	<10	46.6	13.5	19.9	46.6	25.6	20.3
Plenasium	Holophyletic	22	21.2	22.4	24.9	19.2	<10	31.9	22.4	<10	64.7	55.1	28.1	67.6	57.9	34.2
Subgenus Aurealcaulis s.l.†	Possibly paraphyletic	15.2	16	<10	14.5	15.5	<10	17.2	17.1	<10	32.3	26.8	26.1	29.5	26.1	11.4
Subgenus Aurealcaulis s.str.†	Likely holophyletic	26.3	13.2	<10	27.5	13.1	<10	31	14.5	<10	41.8	22.6	10.5	40.3	20.6	<10
Subgenus Plenasium	Holophyletic	41.8	30.6	22.4	42.9	30.6	23.7	44.2	30.5	21.7	45.9	31.6	14.2	46.9	33.1	32.5
Todeinae	Holophyletic	39.2	20.8	13	47.5	23.5	<10	45.5	23.1	<10	45.8	74.8	<10	–	–	–
Leptopteris (incl. ?L. estipularis)	Possibly holophyletic	15.8	<10	<10	15.9	<10	12.6	15.2	15.4	14.1	<10	10.8	12.7	–	–	–
Only modern Leptopteris + Todea	[Not formalized]	22.6	21.9	<10	26.6	23.6	11.9	25.1	24	<10	<10	27.5	<10	–	–	–
L. fraseri + Todea	[Not recognized]	38.6	10	11.3	47	12.7	11.9	43.8	14	11.1	44.2	24.9	13.3	–	–	–
Modern Leptopteris	Holophyletic	<10	34	17	<10	31.2	17.7	<10	30.6	17.8	<10	25.8	15.6	–	–	–
Todea	Holophyletic	63.7	65.9	46	73.1	68.5	48.6	63.8	69.3	43.4	71.7	74.8	51.8	–	–	–
* Today monotypic; includes Cretaceous onwards fossils assigned to O. cinnamomeum or addressed as O. precinnamomeum
† I.e., including or excluding the morphologically intermediate P. chandleri and P. dowkeri

## Sheet: Close-ups
Matrix	Split	ML	NJ	MP	bootstrap support
S01	Grammatocaulis sister to Grammatopteris [Gpt.]	10	34.9	26.2
S01	Grammatocaulis sister to Gpt. baldaufii	87.3	65	65.3
S01	Gpt.freitasii + Gpt. rigollotii	93.4	99	90
S02	Guaireoideae | Itopsidemoideae	77.1	76	70.4
S02	Lunea + Zhongmingella	43.9	45	48.3
S02	Lunea + Guairea	27.7	29.1	11.9
S02	Guairea [Gu.]	67.4	76.9	71.3
S02	Gu. braziliensis + Gu. carnierii	74.7	80.5	41.6
S02	Itopsidema + Donwelliacaulis	58.5	57.6	63
S02	Itopsidema + Tiania	27.7	36.4	14.5
S04	Th. kidstonii + Th. diploxylon + Th. uralica + Th. gracilis| all other	36.5	<10	<10
S04	Chasmatopteris + Th. kazanensis | all other	<10	60.3	<10
S04	Th. schlechtendalii + below | all other	40.3	<10	22.4
S04	Chasmatopteris + Th. splendida | all other	39.3	<10	44.4
S04	Th. schlechtendalii + Th. javorskii + Th. splendida | all other	23.4	31.9	56.5
S04	Th. javorskii + Th. splendida | all other	33.7	52.2	12.2
S06	Shuichengella + Osmundacaulis [Oc.] nerii | all other	<10	43.2	30.7
S06	Shuichengella + Oc. jonesii | all other	32.3	34	31.2
S06	Oc. atherstonii + Oc. natalensis + Oc. skidegatensis | all other	20.9	36.9	15.2
S06	Oc. atherstonii + Oc. natalensis | all other	34.3	28.5	<10
S06	Oc. hoskingii (both vars) + Oc. zululandensis | all other	70.7	84.3	33.5
S06	Oc. hoskingii var. tabulatus + Oc. zululandensis | all other	28.6	43	<10
S06	Oc. hoskingii var. hoskingii + Oc. zululandensis | all other	41.8	21.4	<10
S06	All below | all other	39	33.3	28.9
S06	Oc. griggsii + Oc. pruchnickii | all other	31.4	38.6	<10
S06	Oc. andrewii + Oc. tasmanensis + Oc. tehuelchensis + Oc. richmondii | all other	68.1	46.2	49.9
S06	Oc. andrewii + Oc. tasmanensis + Oc. tehuelchensis| all other	45.3	<10	20.7
S06	Oc. andrewii + Oc. tasmanensis | all other	64.8	56	13.6
S07	Mc. amarjolensis + Mc. beipiaoensis | all other	30.7	42.1	22.4
S07	Mc. broganii + Mc. woolfei | all other	93.7	87.2	67.5
S07	Mc. dunlopii + Mc. aucklandicus | all other	42.4	42.4	11.6
S07	Mc. indica + Mc. donponii | all other	57.2	59.2	27.1
S07	Mc.hebeiensis + Mc. rajmahalensis | all other	30.2	36.7	27.8
S07	Mc. herbstii + Mc. kolbei | all other	30.7	48.9	19.7
S07	Mc. spinksii + Mc. websteri| all other	30.1	37.3	<10
S11	Subgenus Aurealcaulis [SgA] | all other	49.3	36	21.9
S11	Subgenus Plenasium [SgP] | all other	78.2	65.3	55.8
S11	Plenasium [Pl.] dowkeri +SgP | Pl. chandleri + SgA	52.8	41.6	33.3
S11	SgP: Pl. vachellii + Pl. javanica | all other	36.5	51.4	11.9
S11	SgP: Pl. bromeliifolium + Pl. javanicum | all other	20.9	37.8	24.8
S11	SgP: Pl. arnoldii + Pl. bromeliifolium + Pl. banksiifolium | all other	44.3	20.7	27.8
S11	SgP: Pl. bromeliifolium + Pl. banksiifolium | all other	52	42.7	25.9
S11	SgA: Pl. bransonii + Pl. nebraskense | all other	22.9	34.2	18.7
S11	All SgA except Pl. bransonii | all other	50.4	29.3	18.9
S11	SgA: Pl. moorei + Pl. nebraskense | all other	15.9	37.3	<10
S11	SgA: Pl. burgii + Pl. crossi + Pl. dakotense | all other	57.3	32.1	34
S11	SgA: Pl. crossi + Pl. dakotense | all other	43.1	53.8	27
S01	Note: Splits in a rooted tree under the assumption that Rastropteris and Grammatopteris are mutually holophyletic
S04	Note: Only splits listed found in more 33% in at least one of the BS pseudoreplicate samples
S05	Note: Only splits listed found in more 33% in at least one of the BS pseudoreplicate samples
S06	Note: Only splits listed found in more 33% in at least one of the BS pseudoreplicate samples
S11	Note: Only splits listed found in more 33% in at least one of the BS pseudoreplicate samples

## Sheet: S04 Heatmap
Total number of characters: 20	NUC	Thamnopteris_diploxylon	Thamnopteris_gwynnevaughanii	Thamnopteris_kidstonii	Thamnopteris_kazanensis	Thamnopteris_uralica	Thamnopteris_gracilis	Thamnopteris_schlechtendalii	Thamnopteris_splendida	Thamnopteris_javorskii	Bathypteris_rhomboidea	Chasmatopteris_principalis		Character matrix (occassional ambiguities replaced by missing data)
Thamnopteris_diploxylon	7	–	0	0	0	0	0.111111	0.111111	0.142857	0.111111	0.285714	0.375		Thamnopteris_diploxylon	1	?	0	0	?	?	0	1	?	1	?	?	?	?	?	?	?	?	1	?
Thamnopteris_gwynnevaughanii	17	0	–	0.105263	0	0	0.111111	0.105263	0.285714	0.315789	0.214286	0.470588		Thamnopteris_gwynnevaughanii	1	0	0	0	2	2	0	1	?	1	0	0	0	1	0	1	0	0	?	?
Thamnopteris_kidstonii	16	0	0.105263	–	0.0833333	0	0.111111	0.157895	0.357143	0.421053	0.214286	0.352941		Thamnopteris_kidstonii	1	1	0	0	?	?	0	1	2	1	0	0	0	1	0	1	0	1	?	?
Thamnopteris_kazanensis	10	0	0	0.0833333	–	0	0	0.0833333	0.333333	0.416667	0.25	0.166667		Thamnopteris_kazanensis	?	?	?	?	?	?	0	1	?	1	?	0	0	1	0	1	0	0	?	?
Thamnopteris_uralica	7	0	0	0	0	–	0	0.111111	0.125	0.111111	0.25	0.444444		Thamnopteris_uralica	?	?	0	0	2	?	0	1	?	1	?	?	?	?	?	?	?	?	1	?
Thamnopteris_gracilis	7	0.111111	0.111111	0.111111	0	0	–	0.222222	0.142857	0.222222	0.285714	0.375		Thamnopteris_gracilis	0	?	0	0	?	?	0	1	?	1	?	?	?	?	?	?	?	?	1	?
Thamnopteris_schlechtendalii	17	0.111111	0.105263	0.157895	0.0833333	0.111111	0.222222	–	0.214286	0.315789	0.285714	0.529412		Thamnopteris_splendida	?	0	1	0	2	2	0	1	2	1	2	2	?	?	0	1	1	?	?	?
Thamnopteris_splendida	15	0.142857	0.285714	0.357143	0.333333	0.125	0.142857	0.214286	–	0.214286	0.416667	0.461538		Thamnopteris_schlechtendalii	1	0	1	0	2	2	?	1	2	1	0	0	0	1	0	1	0	2	?	?
Thamnopteris_javorskii	13	0.111111	0.315789	0.421053	0.416667	0.111111	0.222222	0.315789	0.214286	–	0.5	0.529412		Thamnopteris_javorskii	1	0	1	0	2	2	0	1	?	?	2	1	1	0	1	1	0	0	?	?
Bathypteris_rhomboidea	13	0.285714	0.214286	0.214286	0.25	0.25	0.285714	0.285714	0.416667	0.5	–	0.538462		Bathypteris_rhomboidea	?	0	0	0	2	?	0	2	?	1	0	0	0	?	0	2	?	?	0	?
Chasmatopteris_principalis	17	0.375	0.470588	0.352941	0.166667	0.444444	0.375	0.529412	0.461538	0.529412	0.538462	–		Chasmatopteris_principalis	?	?	2	1	1	1	0	1	2	1	1	0	1	1	0	1	1	0	0	?
																					*Variable in T. schlecht. only
NUC = Number of unambiguously defined characters

## Sheet: S07 Heatmap
Total number of characters: 23	'Millerocaulis'_stipabonettiorum	Millerocaulis_guptai	Millerocaulis_spinksii	Millerocaulis_websteri	Millerocaulis_swanensis	Millerocaulis_wadei	Millerocaulis_santaecrucis	Millerocaulis_chubutensis	Millerocaulis_livingstonensis	Millerocaulis_donponii	Millerocaulis_indica	Millerocaulis_richmondii	Millerocaulis_beipiaoensis	Millerocaulis_amarjolensis	Millerocaulis_macromedullosus	Millerocaulis_rajmahalensis	Millerocaulis_hebeiensis	Millerocaulis_woolfei	Millerocaulis_broganii	Millerocaulis_australis	Millerocaulis_wrightii	Millerocaulis_patagonicus	Millerocaulis_aucklandicus	Millerocaulis_dunlopii	Millerocaulis_sahnii	Millerocaulis_limewoodensis	Millerocaulis_gibbianus	Millerocaulis_lutziae	Millerocaulis_juandahensis	Millerocaulis_tuhajkulensis	Millerocaulis_herbstii	Millerocaulis_kolbei
'Millerocaulis'_stipabonettiorum	–	0.133333	0.1875	0.1875	0.25	0.266667	0.333333	0.357143	0.375	0.266667	0.2	0.25	0.266667	0.1875	0.2	0.375	0.4	0.333333	0.3125	0.307692	0.4	0.466667	0.466667	0.416667	0.333333	0.357143	0.466667	0.4	0.2	0.545455	0.2	0.5625
Millerocaulis_guptai	0.133333	–	0.117647	0.0588235	0.176471	0.3125	0.363636	0.5	0.235294	0.333333	0.3125	0.176471	0.2	0.176471	0.2	0.294118	0.333333	0.25	0.235294	0.4	0.4	0.375	0.466667	0.384615	0.3125	0.5	0.3125	0.2	0.333333	0.5	0.25	0.470588
Millerocaulis_spinksii	0.1875	0.117647	–	0.0526316	0.210526	0.277778	0.384615	0.375	0.210526	0.235294	0.277778	0.263158	0.352941	0.368421	0.352941	0.421053	0.411765	0.333333	0.315789	0.4375	0.411765	0.444444	0.470588	0.466667	0.388889	0.375	0.333333	0.25	0.294118	0.583333	0.333333	0.526316
Millerocaulis_websteri	0.1875	0.0588235	0.0526316	–	0.1	0.157895	0.285714	0.352941	0.1	0.222222	0.263158	0.15	0.222222	0.25	0.222222	0.3	0.333333	0.222222	0.2	0.352941	0.333333	0.421053	0.333333	0.375	0.263158	0.470588	0.315789	0.166667	0.277778	0.461538	0.307692	0.5
Millerocaulis_swanensis	0.25	0.176471	0.210526	0.1	–	0.0952381	0.2	0.263158	0.2	0.277778	0.210526	0.136364	0.25	0.2	0.277778	0.181818	0.25	0.2	0.181818	0.210526	0.2	0.35	0.2	0.176471	0.210526	0.315789	0.285714	0.25	0.2	0.266667	0.307692	0.55
Millerocaulis_wadei	0.266667	0.3125	0.277778	0.157895	0.0952381	–	0.0666667	0.157895	0.210526	0.333333	0.333333	0.190476	0.157895	0.210526	0.222222	0.238095	0.25	0.210526	0.190476	0.210526	0.2	0.315789	0.2	0.25	0.210526	0.315789	0.3	0.166667	0.25	0.285714	0.416667	0.526316
Millerocaulis_santaecrucis	0.333333	0.363636	0.384615	0.285714	0.2	0.0666667	–	0.0714286	0.214286	0.214286	0.153846	0.2	0.142857	0.142857	0.285714	0.133333	0.2	0.307692	0.333333	0.142857	0.2	0.285714	0.2	0.230769	0.142857	0.285714	0.428571	0.333333	0.2	0.454545	0.571429	0.571429
Millerocaulis_chubutensis	0.357143	0.5	0.375	0.352941	0.263158	0.157895	0.0714286	–	0.294118	0.176471	0.117647	0.315789	0.333333	0.352941	0.470588	0.315789	0.315789	0.411765	0.421053	0.294118	0.210526	0.388889	0.157895	0.2	0.176471	0.157895	0.421053	0.363636	0.263158	0.5	0.636364	0.705882
Millerocaulis_livingstonensis	0.375	0.235294	0.210526	0.1	0.2	0.210526	0.214286	0.294118	–	0.166667	0.263158	0.25	0.222222	0.25	0.277778	0.3	0.277778	0.277778	0.3	0.294118	0.277778	0.421053	0.277778	0.375	0.210526	0.411765	0.421053	0.166667	0.333333	0.461538	0.461538	0.5
Millerocaulis_donponii	0.266667	0.333333	0.235294	0.222222	0.277778	0.333333	0.214286	0.176471	0.166667	–	0.0588235	0.277778	0.294118	0.277778	0.277778	0.333333	0.388889	0.4375	0.444444	0.375	0.333333	0.411765	0.333333	0.357143	0.222222	0.294118	0.529412	0.333333	0.222222	0.666667	0.545455	0.555556
Millerocaulis_indica	0.2	0.3125	0.277778	0.263158	0.210526	0.333333	0.153846	0.117647	0.263158	0.0588235	–	0.210526	0.294118	0.210526	0.352941	0.263158	0.294118	0.411765	0.421053	0.375	0.294118	0.421053	0.235294	0.25	0.166667	0.235294	0.473684	0.363636	0.176471	0.615385	0.384615	0.578947
Millerocaulis_richmondii	0.25	0.176471	0.263158	0.15	0.136364	0.190476	0.2	0.315789	0.25	0.277778	0.210526	–	0.2	0.2	0.277778	0.272727	0.35	0.4	0.363636	0.421053	0.35	0.45	0.35	0.294118	0.210526	0.473684	0.428571	0.25	0.25	0.466667	0.307692	0.55
Millerocaulis_beipiaoensis	0.266667	0.2	0.352941	0.222222	0.25	0.157895	0.142857	0.333333	0.222222	0.294118	0.294118	0.2	–	0.0555556	0.176471	0.2	0.263158	0.166667	0.2	0.235294	0.368421	0.388889	0.368421	0.4	0.294118	0.5	0.526316	0.416667	0.263158	0.5	0.454545	0.611111
Millerocaulis_amarjolensis	0.1875	0.176471	0.368421	0.25	0.2	0.210526	0.142857	0.352941	0.25	0.277778	0.210526	0.2	0.0555556	–	0.166667	0.15	0.222222	0.222222	0.25	0.235294	0.333333	0.368421	0.333333	0.3125	0.210526	0.470588	0.526316	0.333333	0.277778	0.461538	0.307692	0.55
Millerocaulis_macromedullosus	0.2	0.2	0.352941	0.222222	0.277778	0.222222	0.285714	0.470588	0.277778	0.277778	0.352941	0.277778	0.176471	0.166667	–	0.333333	0.388889	0.25	0.222222	0.25	0.388889	0.352941	0.388889	0.5	0.277778	0.588235	0.470588	0.416667	0.277778	0.5	0.272727	0.388889
Millerocaulis_rajmahalensis	0.375	0.294118	0.421053	0.3	0.181818	0.238095	0.133333	0.315789	0.3	0.333333	0.263158	0.272727	0.2	0.15	0.333333	–	0.15	0.3	0.318182	0.263158	0.3	0.35	0.3	0.294118	0.263158	0.421053	0.47619	0.416667	0.3	0.466667	0.461538	0.6
Millerocaulis_hebeiensis	0.4	0.333333	0.411765	0.333333	0.25	0.25	0.2	0.315789	0.277778	0.388889	0.294118	0.35	0.263158	0.222222	0.388889	0.15	–	0.166667	0.25	0.166667	0.25	0.277778	0.25	0.333333	0.333333	0.315789	0.421053	0.416667	0.35	0.285714	0.363636	0.444444
Millerocaulis_woolfei	0.333333	0.25	0.333333	0.222222	0.2	0.210526	0.307692	0.411765	0.277778	0.4375	0.411765	0.4	0.166667	0.222222	0.25	0.3	0.166667	–	0	0.176471	0.333333	0.222222	0.277778	0.333333	0.470588	0.352941	0.263158	0.5	0.333333	0.307692	0.272727	0.444444
Millerocaulis_broganii	0.3125	0.235294	0.315789	0.2	0.181818	0.190476	0.333333	0.421053	0.3	0.444444	0.421053	0.363636	0.2	0.25	0.222222	0.318182	0.25	0	–	0.263158	0.4	0.35	0.3	0.411765	0.473684	0.473684	0.333333	0.5	0.3	0.333333	0.384615	0.5
Millerocaulis_australis	0.307692	0.4	0.4375	0.352941	0.210526	0.210526	0.142857	0.294118	0.294118	0.375	0.375	0.421053	0.235294	0.235294	0.25	0.263158	0.166667	0.176471	0.263158	–	0.0555556	0.117647	0.166667	0.285714	0.235294	0.235294	0.277778	0.4	0.277778	0.285714	0.272727	0.470588
Millerocaulis_wrightii	0.4	0.4	0.411765	0.333333	0.2	0.2	0.2	0.210526	0.277778	0.333333	0.294118	0.35	0.368421	0.333333	0.388889	0.3	0.25	0.333333	0.4	0.0555556	–	0.166667	0.1	0.133333	0.111111	0.157895	0.210526	0.25	0.35	0.285714	0.363636	0.555556
Millerocaulis_patagonicus	0.466667	0.375	0.444444	0.421053	0.35	0.315789	0.285714	0.388889	0.421053	0.411765	0.421053	0.45	0.388889	0.368421	0.352941	0.35	0.277778	0.222222	0.35	0.117647	0.166667	–	0.166667	0.176471	0.277778	0.222222	0.2	0.363636	0.444444	0.5	0.307692	0.368421
Millerocaulis_aucklandicus	0.466667	0.466667	0.470588	0.333333	0.2	0.2	0.2	0.157895	0.277778	0.333333	0.235294	0.35	0.368421	0.333333	0.388889	0.3	0.25	0.277778	0.3	0.166667	0.1	0.166667	–	0	0.111111	0.157895	0.210526	0.333333	0.35	0.285714	0.363636	0.444444
Millerocaulis_dunlopii	0.416667	0.384615	0.466667	0.375	0.176471	0.25	0.230769	0.2	0.375	0.357143	0.25	0.294118	0.4	0.3125	0.5	0.294118	0.333333	0.333333	0.411765	0.285714	0.133333	0.176471	0	–	0.133333	0.133333	0.176471	0.111111	0.4	0.416667	0.363636	0.4375
Millerocaulis_sahnii	0.333333	0.3125	0.388889	0.263158	0.210526	0.210526	0.142857	0.176471	0.210526	0.222222	0.166667	0.210526	0.294118	0.210526	0.277778	0.263158	0.333333	0.470588	0.473684	0.235294	0.111111	0.277778	0.111111	0.133333	–	0.294118	0.333333	0.166667	0.333333	0.5	0.333333	0.526316
Millerocaulis_limewoodensis	0.357143	0.5	0.375	0.470588	0.315789	0.315789	0.285714	0.157895	0.411765	0.294118	0.235294	0.473684	0.5	0.470588	0.588235	0.421053	0.315789	0.352941	0.473684	0.235294	0.157895	0.222222	0.157895	0.133333	0.294118	–	0.263158	0.363636	0.315789	0.428571	0.454545	0.588235
Millerocaulis_gibbianus	0.466667	0.3125	0.333333	0.315789	0.285714	0.3	0.428571	0.421053	0.421053	0.529412	0.473684	0.428571	0.526316	0.526316	0.470588	0.47619	0.421053	0.263158	0.333333	0.277778	0.210526	0.2	0.210526	0.176471	0.333333	0.263158	–	0.272727	0.473684	0.4	0.307692	0.368421
Millerocaulis_lutziae	0.4	0.2	0.25	0.166667	0.25	0.166667	0.333333	0.363636	0.166667	0.333333	0.363636	0.25	0.416667	0.333333	0.416667	0.416667	0.416667	0.5	0.5	0.4	0.25	0.363636	0.333333	0.111111	0.166667	0.363636	0.272727	–	0.5	0.571429	0.4	0.416667
Millerocaulis_juandahensis	0.2	0.333333	0.294118	0.277778	0.2	0.25	0.2	0.263158	0.333333	0.222222	0.176471	0.25	0.263158	0.277778	0.277778	0.3	0.35	0.333333	0.3	0.277778	0.35	0.444444	0.35	0.4	0.333333	0.315789	0.473684	0.5	–	0.428571	0.454545	0.555556
Millerocaulis_tuhajkulensis	0.545455	0.5	0.583333	0.461538	0.266667	0.285714	0.454545	0.5	0.461538	0.666667	0.615385	0.466667	0.5	0.461538	0.5	0.466667	0.285714	0.307692	0.333333	0.285714	0.285714	0.5	0.285714	0.416667	0.5	0.428571	0.4	0.571429	0.428571	–	0.4	0.461538
Millerocaulis_herbstii	0.2	0.25	0.333333	0.307692	0.307692	0.416667	0.571429	0.636364	0.461538	0.545455	0.384615	0.307692	0.454545	0.307692	0.272727	0.461538	0.363636	0.272727	0.384615	0.272727	0.363636	0.307692	0.363636	0.363636	0.333333	0.454545	0.307692	0.4	0.454545	0.4	–	0.230769
Millerocaulis_kolbei	0.5625	0.470588	0.526316	0.5	0.55	0.526316	0.571429	0.705882	0.5	0.555556	0.578947	0.55	0.611111	0.55	0.388889	0.6	0.444444	0.444444	0.5	0.470588	0.555556	0.368421	0.444444	0.4375	0.526316	0.588235	0.368421	0.416667	0.555556	0.461538	0.230769	–

## Sheet: S08
		Within lineage		To other lineages					Within lineage		To other lineages
		Min	Max	Min	Max	Min	Max		Min	Max	Min	Max
	Todeinae	0	0.263158			0.1	0.625		0.0333333	0.1	0.133333	0.608696	Osmundastrum cinnamomeum
	Todeinae (excluding estipularis)	0	0.238095			0.166667	0.625			0.166667	0.133333	0.64	+ O. precinnamomeum
	L. estipularis + L. wilkesiana	0.05		0.0333333	0.263158	0.1	0.565217			0.172414	0.1	0.64	+ O. pulchellum
	Leptopteris	0	0.15	0.137931	0.263158	0.1	0.565217			0.310345	0.1	0.64	+ O. indentatum
	Leptopteris (estipularis not considered)	0	0.103448	0.137931	0.238095	0.166667	0.565217		0.142857		0.153846	0.565217	O. indentatum + C. embreii
	L. fraseri + Todea	0.0952381	0.227273	0.0689655	0.263158	0.192308	0.625		0.142857	0.25	0.107143	0.565217	O. indentatum + C. embreii + C. sinica
	L. fraseri + T. barbara	0.137931		0.0689655	0.25	0.192308	0.625		0.107143	0.285714	0.130435	0.652174	O. indentatum + C. embreii + C. sinica + C. preosmunda
	Todea	0.0952381		0.190476	0.263158	0.241379	0.625
Genus	Total number of characters: 23	Gen_indet_estipularis	Leptopteris_wilkesiana	Leptopteris_hymenophylloides	Leptopteris_superba	Leptopteris_fraseri	Todea_barbara	Todea_tidwellii	Osmunda_cinnamomea_Neogene_Japan	Osmunda_cinnamomea	Osmunda_cinnamomea_Cretaceous_Canada	Osmunda_cinnamomea_Neogene_USA	Osmunda_precinnamomea	Osmunda_pulchella	Osmunda_indentata	Osmunda_embreei	Osmunda_sinica	Osmunda_preosmunda	Osmunda_beardmorensis	Osmunda_chengii	Osmunda_liaoningensis	Osmunda_plumites	Osmunda_wangii	Osmunda_johnstonii	Osmunda_tekelili	Osmunda_pluma	Osmunda_wehrii	Osmunda_claytoniana	Osmunda_oregonensis	Osmunda_iliaensis	Osmunda_japonica	Osmunda_lancea	Osmunda_regalis	Osmunda_shimokawaensis	Osmunda_moorei	Osmunda_burgii	Osmunda_dakotensis	Osmunda_crossii	Osmunda_nebraskensis	Osmunda_bransonii	ALT2_Osmunda_chandleri	ALT2_Osmunda_dowkeri_CHANDLER	Osmunda_arnoldii	Osmunda_banksiifolia	Osmunda_bromeliifolia	Osmunda_javanica	Osmunda_vachellii
?Leptopteris	Gen_indet_estipularis	–	0.05	0.1	0.1	0.15	0.25	0.263158	0.157895	0.25	0.25	0.3	0.25	0.1	0.263158	0.210526	0.210526	0.277778	0.277778	0.2	0.25	0.157895	0.15	0.15	0.3125	0.210526	0.2	0.1	0.210526	0.2	0.2	0.1	0.25	0.2	0.45	0.470588	0.5	0.388889	0.421053	0.444444	0.352941	0.4	0.4	0.4	0.4	0.35	0.4
Leptopteris	Leptopteris_wilkesiana	0.05	–	0.0333333	0.0333333	0.103448	0.206897	0.190476	0.222222	0.233333	0.3	0.266667	0.366667	0.241379	0.241379	0.214286	0.25	0.259259	0.291667	0.2	0.233333	0.241379	0.241379	0.233333	0.269231	0.310345	0.3	0.3	0.37931	0.3	0.366667	0.266667	0.366667	0.241379	0.4	0.423077	0.416667	0.434783	0.458333	0.565217	0.434783	0.344828	0.344828	0.413793	0.366667	0.266667	0.344828
Leptopteris	Leptopteris_hymenophylloides	0.1	0.0333333	–	0	0.0689655	0.172414	0.238095	0.185185	0.2	0.266667	0.233333	0.333333	0.206897	0.275862	0.214286	0.25	0.259259	0.25	0.166667	0.2	0.206897	0.206897	0.2	0.307692	0.275862	0.266667	0.266667	0.344828	0.266667	0.333333	0.233333	0.333333	0.206897	0.44	0.423077	0.416667	0.478261	0.5	0.565217	0.434783	0.37931	0.310345	0.37931	0.333333	0.233333	0.310345
Leptopteris	Leptopteris_superba	0.1	0.0333333	0	–	0.0689655	0.172414	0.238095	0.185185	0.2	0.266667	0.233333	0.333333	0.206897	0.275862	0.214286	0.25	0.259259	0.25	0.166667	0.2	0.206897	0.206897	0.2	0.307692	0.275862	0.266667	0.266667	0.344828	0.266667	0.333333	0.233333	0.333333	0.206897	0.44	0.423077	0.416667	0.478261	0.5	0.565217	0.434783	0.37931	0.310345	0.37931	0.333333	0.233333	0.310345
Leptopteris	Leptopteris_fraseri	0.15	0.103448	0.0689655	0.0689655	–	0.137931	0.227273	0.192308	0.206897	0.275862	0.241379	0.275862	0.206897	0.275862	0.214286	0.285714	0.333333	0.24	0.233333	0.266667	0.310345	0.275862	0.266667	0.346154	0.310345	0.3	0.266667	0.344828	0.233333	0.266667	0.266667	0.3	0.241379	0.52	0.384615	0.36	0.416667	0.5	0.521739	0.434783	0.333333	0.3	0.333333	0.4	0.3	0.3
Todea	Todea_barbara	0.25	0.206897	0.172414	0.172414	0.137931	–	0.0952381	0.307692	0.310345	0.241379	0.275862	0.241379	0.357143	0.357143	0.296296	0.444444	0.5	0.416667	0.37931	0.310345	0.428571	0.321429	0.344828	0.4	0.357143	0.275862	0.344828	0.392857	0.37931	0.413793	0.37931	0.448276	0.357143	0.625	0.44	0.458333	0.565217	0.565217	0.5	0.5	0.344828	0.344828	0.275862	0.37931	0.275862	0.275862
Todea	Todea_tidwellii	0.263158	0.190476	0.238095	0.238095	0.227273	0.0952381	–	0.368421	0.333333	0.285714	0.285714	0.285714	0.318182	0.333333	0.4	0.5	0.526316	0.473684	0.409091	0.272727	0.47619	0.333333	0.363636	0.277778	0.333333	0.318182	0.363636	0.333333	0.318182	0.318182	0.318182	0.318182	0.333333	0.428571	0.444444	0.470588	0.473684	0.380952	0.421053	0.4	0.363636	0.454545	0.363636	0.454545	0.318182	0.363636
Osmundastrum	Osmunda_cinnamomea_Neogene_Japan	0.157895	0.222222	0.185185	0.185185	0.192308	0.307692	0.368421	–	0.037037	0.037037	0.0740741	0.111111	0.0769231	0.230769	0.153846	0.230769	0.28	0.227273	0.259259	0.185185	0.192308	0.185185	0.148148	0.347826	0.269231	0.259259	0.148148	0.346154	0.185185	0.259259	0.222222	0.296296	0.222222	0.521739	0.5	0.545455	0.52381	0.5	0.52381	0.5	0.461538	0.423077	0.384615	0.37037	0.333333	0.423077
Osmundastrum	Osmunda_cinnamomea	0.25	0.233333	0.2	0.2	0.206897	0.310345	0.333333	0.037037	–	0.1	0.0333333	0.166667	0.137931	0.275862	0.25	0.285714	0.259259	0.208333	0.3	0.133333	0.241379	0.206897	0.233333	0.346154	0.344828	0.3	0.266667	0.413793	0.266667	0.333333	0.3	0.3	0.275862	0.48	0.538462	0.541667	0.565217	0.541667	0.608696	0.565217	0.517241	0.482759	0.482759	0.466667	0.4	0.482759
Osmundastrum	Osmunda_cinnamomea_Cretaceous_Canada	0.25	0.3	0.266667	0.266667	0.275862	0.241379	0.285714	0.037037	0.1	–	0.0666667	0.0666667	0.172414	0.241379	0.214286	0.321429	0.37037	0.333333	0.366667	0.233333	0.275862	0.241379	0.2	0.384615	0.344828	0.266667	0.233333	0.413793	0.3	0.366667	0.333333	0.4	0.310345	0.56	0.5	0.583333	0.608696	0.541667	0.521739	0.565217	0.517241	0.482759	0.37931	0.366667	0.333333	0.413793
Osmundastrum	Osmunda_cinnamomea_Neogene_USA	0.3	0.266667	0.233333	0.233333	0.241379	0.275862	0.285714	0.0740741	0.0333333	0.0666667	–	0.133333	0.172414	0.241379	0.285714	0.321429	0.296296	0.25	0.333333	0.166667	0.275862	0.241379	0.2	0.346154	0.37931	0.266667	0.3	0.448276	0.3	0.366667	0.333333	0.333333	0.310345	0.48	0.5	0.541667	0.608696	0.541667	0.608696	0.608696	0.551724	0.517241	0.448276	0.433333	0.366667	0.448276
Osmundastrum	Osmunda_precinnamomea	0.25	0.366667	0.333333	0.333333	0.275862	0.241379	0.285714	0.111111	0.166667	0.0666667	0.133333	–	0.172414	0.310345	0.285714	0.321429	0.444444	0.333333	0.433333	0.3	0.344828	0.310345	0.266667	0.461538	0.344828	0.266667	0.233333	0.344828	0.266667	0.3	0.333333	0.366667	0.310345	0.64	0.423077	0.583333	0.608696	0.5	0.434783	0.478261	0.517241	0.482759	0.37931	0.433333	0.4	0.413793
Osmundastrum	Osmunda_pulchella	0.1	0.241379	0.206897	0.206897	0.206897	0.357143	0.318182	0.0769231	0.137931	0.172414	0.172414	0.172414	–	0.241379	0.25	0.178571	0.222222	0.16	0.2	0.2	0.137931	0.137931	0.166667	0.269231	0.172414	0.166667	0.1	0.206897	0.1	0.166667	0.1	0.166667	0.137931	0.4	0.423077	0.458333	0.391304	0.333333	0.391304	0.347826	0.482759	0.413793	0.413793	0.4	0.366667	0.413793
Osmundastrum	Osmunda_indentata	0.263158	0.241379	0.275862	0.275862	0.275862	0.357143	0.333333	0.230769	0.275862	0.241379	0.241379	0.310345	0.241379	–	0.142857	0.25	0.285714	0.416667	0.366667	0.366667	0.37931	0.413793	0.3	0.296296	0.448276	0.366667	0.366667	0.482759	0.333333	0.4	0.366667	0.433333	0.310345	0.44	0.384615	0.458333	0.434783	0.416667	0.521739	0.565217	0.448276	0.517241	0.413793	0.4	0.366667	0.448276
Osmundastrum	Osmunda_embreei	0.210526	0.214286	0.214286	0.214286	0.214286	0.296296	0.4	0.153846	0.25	0.214286	0.285714	0.285714	0.25	0.142857	–	0.172414	0.214286	0.291667	0.241379	0.310345	0.285714	0.206897	0.241379	0.32	0.321429	0.310345	0.206897	0.357143	0.275862	0.344828	0.310345	0.37931	0.275862	0.52	0.444444	0.48	0.478261	0.458333	0.458333	0.478261	0.321429	0.392857	0.321429	0.344828	0.310345	0.392857
Claytosmunda	Osmunda_sinica	0.210526	0.25	0.25	0.25	0.285714	0.444444	0.5	0.230769	0.285714	0.321429	0.321429	0.321429	0.178571	0.25	0.172414	–	0.107143	0.208333	0.275862	0.206897	0.178571	0.275862	0.206897	0.28	0.214286	0.275862	0.206897	0.321429	0.241379	0.310345	0.206897	0.344828	0.172414	0.52	0.407407	0.48	0.478261	0.458333	0.541667	0.478261	0.464286	0.464286	0.464286	0.448276	0.413793	0.464286
Claytosmunda	Osmunda_preosmunda	0.277778	0.259259	0.259259	0.259259	0.333333	0.5	0.526316	0.28	0.259259	0.37037	0.296296	0.444444	0.222222	0.285714	0.214286	0.107143	–	0.130435	0.214286	0.178571	0.148148	0.178571	0.25	0.2	0.222222	0.25	0.25	0.333333	0.285714	0.357143	0.25	0.321429	0.285714	0.458333	0.538462	0.541667	0.545455	0.565217	0.652174	0.545455	0.518519	0.518519	0.555556	0.5	0.428571	0.518519
Claytosmunda	Osmunda_beardmorensis	0.277778	0.291667	0.25	0.25	0.24	0.416667	0.473684	0.227273	0.208333	0.333333	0.25	0.333333	0.16	0.416667	0.291667	0.208333	0.130435	–	0.2	0.16	0.166667	0.12	0.2	0.227273	0.208333	0.2	0.16	0.25	0.2	0.24	0.2	0.16	0.28	0.52381	0.458333	0.434783	0.454545	0.55	0.578947	0.473684	0.52	0.44	0.44	0.48	0.4	0.48
Claytosmunda	Osmunda_chengii	0.2	0.2	0.166667	0.166667	0.233333	0.37931	0.409091	0.259259	0.3	0.366667	0.333333	0.433333	0.2	0.366667	0.241379	0.275862	0.214286	0.2	–	0.193548	0.2	0.133333	0.16129	0.296296	0.266667	0.258065	0.16129	0.2	0.258065	0.322581	0.225806	0.258065	0.233333	0.346154	0.444444	0.36	0.375	0.4	0.458333	0.291667	0.366667	0.366667	0.433333	0.387097	0.290323	0.366667
Claytosmunda	Osmunda_liaoningensis	0.25	0.233333	0.2	0.2	0.266667	0.310345	0.272727	0.185185	0.133333	0.233333	0.166667	0.3	0.2	0.366667	0.310345	0.206897	0.178571	0.16	0.193548	–	0.133333	0.133333	0.129032	0.259259	0.166667	0.225806	0.193548	0.233333	0.225806	0.290323	0.225806	0.193548	0.2	0.346154	0.444444	0.36	0.416667	0.44	0.5	0.375	0.433333	0.366667	0.4	0.354839	0.290323	0.366667
Claytosmunda	Osmunda_plumites	0.157895	0.241379	0.206897	0.206897	0.310345	0.428571	0.47619	0.192308	0.241379	0.275862	0.275862	0.344828	0.137931	0.37931	0.285714	0.178571	0.148148	0.166667	0.2	0.133333	–	0.137931	0.166667	0.269231	0.241379	0.3	0.166667	0.310345	0.266667	0.333333	0.233333	0.3	0.275862	0.48	0.538462	0.5	0.478261	0.5	0.565217	0.521739	0.586207	0.517241	0.517241	0.466667	0.433333	0.517241
Claytosmunda	Osmunda_wangii	0.15	0.241379	0.206897	0.206897	0.275862	0.321429	0.333333	0.185185	0.206897	0.241379	0.241379	0.310345	0.137931	0.413793	0.206897	0.275862	0.178571	0.12	0.133333	0.133333	0.137931	–	0.133333	0.269231	0.172414	0.133333	0.0666667	0.172414	0.233333	0.3	0.2	0.2	0.266667	0.384615	0.555556	0.48	0.5	0.44	0.416667	0.347826	0.413793	0.37931	0.37931	0.366667	0.3	0.37931
Claytosmunda	Osmunda_johnstonii	0.15	0.233333	0.2	0.2	0.266667	0.344828	0.363636	0.148148	0.233333	0.2	0.2	0.266667	0.166667	0.3	0.241379	0.206897	0.25	0.2	0.16129	0.129032	0.166667	0.133333	–	0.333333	0.266667	0.193548	0.129032	0.266667	0.225806	0.290323	0.193548	0.258065	0.2	0.384615	0.407407	0.4	0.458333	0.4	0.458333	0.416667	0.466667	0.4	0.333333	0.290323	0.258065	0.333333
Claytosmunda	Osmunda_tekelili	0.3125	0.269231	0.307692	0.307692	0.346154	0.4	0.277778	0.347826	0.346154	0.384615	0.346154	0.461538	0.269231	0.296296	0.32	0.28	0.2	0.227273	0.296296	0.259259	0.269231	0.269231	0.333333	–	0.259259	0.296296	0.333333	0.333333	0.259259	0.333333	0.296296	0.333333	0.230769	0.318182	0.375	0.347826	0.380952	0.285714	0.4	0.47619	0.384615	0.5	0.423077	0.444444	0.407407	0.5
Claytosmunda	Osmunda_pluma	0.210526	0.310345	0.275862	0.275862	0.310345	0.357143	0.333333	0.269231	0.344828	0.344828	0.37931	0.344828	0.172414	0.448276	0.321429	0.214286	0.222222	0.208333	0.266667	0.166667	0.241379	0.172414	0.266667	0.259259	–	0.1	0.1	0.133333	0.1	0.166667	0.1	0.166667	0.137931	0.44	0.384615	0.44	0.434783	0.416667	0.391304	0.26087	0.344828	0.275862	0.310345	0.3	0.233333	0.275862
Claytosmunda	Osmunda_wehrii	0.2	0.3	0.266667	0.266667	0.3	0.275862	0.318182	0.259259	0.3	0.266667	0.266667	0.266667	0.166667	0.366667	0.310345	0.275862	0.25	0.2	0.258065	0.225806	0.3	0.133333	0.193548	0.296296	0.1	–	0.0967742	0.166667	0.16129	0.225806	0.129032	0.193548	0.2	0.423077	0.407407	0.48	0.541667	0.44	0.416667	0.333333	0.4	0.333333	0.3	0.290323	0.225806	0.266667
Claytosmunda	Osmunda_claytoniana	0.1	0.3	0.266667	0.266667	0.266667	0.344828	0.363636	0.148148	0.266667	0.233333	0.3	0.233333	0.1	0.366667	0.206897	0.206897	0.25	0.16	0.16129	0.193548	0.166667	0.0666667	0.129032	0.333333	0.1	0.0967742	–	0.1	0.0967742	0.16129	0.0967742	0.129032	0.166667	0.423077	0.444444	0.44	0.416667	0.36	0.333333	0.25	0.4	0.333333	0.333333	0.322581	0.290323	0.333333
Osmunda	Osmunda_oregonensis	0.210526	0.37931	0.344828	0.344828	0.344828	0.392857	0.333333	0.346154	0.413793	0.413793	0.448276	0.344828	0.206897	0.482759	0.357143	0.321429	0.333333	0.25	0.2	0.233333	0.310345	0.172414	0.266667	0.333333	0.133333	0.166667	0.1	–	0.133333	0.166667	0.166667	0.133333	0.137931	0.36	0.346154	0.36	0.347826	0.291667	0.217391	0.0869565	0.310345	0.310345	0.344828	0.366667	0.3	0.310345
Osmunda	Osmunda_iliaensis	0.2	0.3	0.266667	0.266667	0.233333	0.37931	0.318182	0.185185	0.266667	0.3	0.3	0.266667	0.1	0.333333	0.275862	0.241379	0.285714	0.2	0.258065	0.225806	0.266667	0.233333	0.225806	0.259259	0.1	0.16129	0.0967742	0.133333	–	0.0322581	0.0645161	0.0967742	0.1	0.423077	0.296296	0.4	0.375	0.32	0.333333	0.291667	0.366667	0.333333	0.3	0.322581	0.290323	0.333333
Osmunda	Osmunda_japonica	0.2	0.366667	0.333333	0.333333	0.266667	0.413793	0.318182	0.259259	0.333333	0.366667	0.366667	0.3	0.166667	0.4	0.344828	0.310345	0.357143	0.24	0.322581	0.290323	0.333333	0.3	0.290323	0.333333	0.166667	0.225806	0.16129	0.166667	0.0322581	–	0.0645161	0.0645161	0.166667	0.461538	0.333333	0.44	0.375	0.32	0.333333	0.291667	0.4	0.366667	0.333333	0.387097	0.354839	0.366667
Osmunda	Osmunda_lancea	0.1	0.266667	0.233333	0.233333	0.266667	0.37931	0.318182	0.222222	0.3	0.333333	0.333333	0.333333	0.1	0.366667	0.310345	0.206897	0.25	0.2	0.225806	0.225806	0.233333	0.2	0.193548	0.296296	0.1	0.129032	0.0967742	0.166667	0.0645161	0.0645161	–	0.0967742	0.1	0.384615	0.37037	0.44	0.375	0.32	0.375	0.291667	0.4	0.333333	0.333333	0.322581	0.290323	0.333333
Osmunda	Osmunda_regalis	0.25	0.366667	0.333333	0.333333	0.3	0.448276	0.318182	0.296296	0.3	0.4	0.333333	0.366667	0.166667	0.433333	0.37931	0.344828	0.321429	0.16	0.258065	0.193548	0.3	0.2	0.258065	0.333333	0.166667	0.193548	0.129032	0.133333	0.0967742	0.0645161	0.0967742	–	0.2	0.307692	0.37037	0.36	0.333333	0.28	0.291667	0.208333	0.4	0.366667	0.366667	0.387097	0.322581	0.366667
Osmunda	Osmunda_shimokawaensis	0.2	0.241379	0.206897	0.206897	0.241379	0.357143	0.333333	0.222222	0.275862	0.310345	0.310345	0.310345	0.137931	0.310345	0.275862	0.172414	0.285714	0.28	0.233333	0.2	0.275862	0.266667	0.2	0.230769	0.137931	0.2	0.166667	0.137931	0.1	0.166667	0.1	0.2	–	0.346154	0.259259	0.32	0.333333	0.28	0.333333	0.26087	0.310345	0.310345	0.310345	0.3	0.266667	0.310345
Plenasium	Osmunda_moorei	0.45	0.4	0.44	0.44	0.52	0.625	0.428571	0.521739	0.48	0.56	0.48	0.64	0.4	0.44	0.52	0.52	0.458333	0.52381	0.346154	0.346154	0.48	0.384615	0.384615	0.318182	0.44	0.423077	0.423077	0.36	0.423077	0.461538	0.384615	0.307692	0.346154	–	0.304348	0.142857	0.217391	0.12	0.25	0.217391	0.28	0.4	0.44	0.346154	0.307692	0.36
Plenasium	Osmunda_burgii	0.470588	0.423077	0.423077	0.423077	0.384615	0.44	0.444444	0.5	0.538462	0.5	0.5	0.423077	0.423077	0.384615	0.444444	0.407407	0.538462	0.458333	0.444444	0.444444	0.538462	0.555556	0.407407	0.375	0.384615	0.407407	0.444444	0.346154	0.296296	0.333333	0.37037	0.37037	0.259259	0.304348	–	0.12	0.130435	0.136364	0.181818	0.227273	0.192308	0.269231	0.192308	0.222222	0.259259	0.230769
Plenasium	Osmunda_dakotensis	0.5	0.416667	0.416667	0.416667	0.36	0.458333	0.470588	0.545455	0.541667	0.583333	0.541667	0.583333	0.458333	0.458333	0.48	0.48	0.541667	0.434783	0.36	0.36	0.5	0.48	0.4	0.347826	0.44	0.48	0.44	0.36	0.4	0.44	0.44	0.36	0.32	0.142857	0.12	–	0.0454546	0.1	0.15	0.2	0.16	0.24	0.24	0.28	0.28	0.24
Plenasium	Osmunda_crossii	0.388889	0.434783	0.478261	0.478261	0.416667	0.565217	0.473684	0.52381	0.565217	0.608696	0.608696	0.608696	0.391304	0.434783	0.478261	0.478261	0.545455	0.454545	0.375	0.416667	0.478261	0.5	0.458333	0.380952	0.434783	0.541667	0.416667	0.347826	0.375	0.375	0.375	0.333333	0.333333	0.217391	0.130435	0.0454546	–	0.136364	0.190476	0.190476	0.166667	0.25	0.25	0.291667	0.333333	0.291667
Plenasium	Osmunda_nebraskensis	0.421053	0.458333	0.5	0.5	0.5	0.565217	0.380952	0.5	0.541667	0.541667	0.541667	0.5	0.333333	0.416667	0.458333	0.458333	0.565217	0.55	0.4	0.44	0.5	0.44	0.4	0.285714	0.416667	0.44	0.36	0.291667	0.32	0.32	0.32	0.28	0.28	0.12	0.136364	0.1	0.136364	–	0.0434783	0.173913	0.208333	0.416667	0.333333	0.36	0.36	0.375
Plenasium	Osmunda_bransonii	0.444444	0.565217	0.565217	0.565217	0.521739	0.5	0.421053	0.52381	0.608696	0.521739	0.608696	0.434783	0.391304	0.521739	0.458333	0.541667	0.652174	0.578947	0.458333	0.5	0.565217	0.416667	0.458333	0.4	0.391304	0.416667	0.333333	0.217391	0.333333	0.333333	0.375	0.291667	0.333333	0.25	0.181818	0.15	0.190476	0.0434783	–	0.136364	0.173913	0.304348	0.217391	0.291667	0.291667	0.26087
Plenasium	ALT2_Osmunda_chandleri	0.352941	0.434783	0.434783	0.434783	0.434783	0.5	0.4	0.5	0.565217	0.565217	0.608696	0.478261	0.347826	0.565217	0.478261	0.478261	0.545455	0.473684	0.291667	0.375	0.521739	0.347826	0.416667	0.47619	0.26087	0.333333	0.25	0.0869565	0.291667	0.291667	0.291667	0.208333	0.26087	0.217391	0.227273	0.2	0.190476	0.173913	0.136364	–	0.130435	0.130435	0.26087	0.25	0.208333	0.173913
Plenasium	ALT2_Osmunda_dowkeri_CHANDLER	0.4	0.344828	0.37931	0.37931	0.333333	0.344828	0.363636	0.461538	0.517241	0.517241	0.551724	0.517241	0.482759	0.448276	0.321429	0.464286	0.518519	0.52	0.366667	0.433333	0.586207	0.413793	0.466667	0.384615	0.344828	0.4	0.4	0.310345	0.366667	0.4	0.4	0.4	0.310345	0.28	0.192308	0.16	0.166667	0.208333	0.173913	0.130435	–	0.133333	0.166667	0.233333	0.166667	0.133333
Plenasium	Osmunda_arnoldii	0.4	0.344828	0.310345	0.310345	0.3	0.344828	0.454545	0.423077	0.482759	0.482759	0.517241	0.482759	0.413793	0.517241	0.392857	0.464286	0.518519	0.44	0.366667	0.366667	0.517241	0.37931	0.4	0.5	0.275862	0.333333	0.333333	0.310345	0.333333	0.366667	0.333333	0.366667	0.310345	0.4	0.269231	0.24	0.25	0.416667	0.304348	0.130435	0.133333	–	0.1	0.1	0.1	0.0666667
Plenasium	Osmunda_banksiifolia	0.4	0.413793	0.37931	0.37931	0.333333	0.275862	0.363636	0.384615	0.482759	0.37931	0.448276	0.37931	0.413793	0.413793	0.321429	0.464286	0.555556	0.44	0.433333	0.4	0.517241	0.37931	0.333333	0.423077	0.310345	0.3	0.333333	0.344828	0.3	0.333333	0.333333	0.366667	0.310345	0.44	0.192308	0.24	0.25	0.333333	0.217391	0.26087	0.166667	0.1	–	0.0666667	0.133333	0.1
Plenasium	Osmunda_bromeliifolia	0.4	0.366667	0.333333	0.333333	0.4	0.37931	0.454545	0.37037	0.466667	0.366667	0.433333	0.433333	0.4	0.4	0.344828	0.448276	0.5	0.48	0.387097	0.354839	0.466667	0.366667	0.290323	0.444444	0.3	0.290323	0.322581	0.366667	0.322581	0.387097	0.322581	0.387097	0.3	0.346154	0.222222	0.28	0.291667	0.36	0.291667	0.25	0.233333	0.1	0.0666667	–	0.0645161	0.1
Plenasium	Osmunda_javanica	0.35	0.266667	0.233333	0.233333	0.3	0.275862	0.318182	0.333333	0.4	0.333333	0.366667	0.4	0.366667	0.366667	0.310345	0.413793	0.428571	0.4	0.290323	0.290323	0.433333	0.3	0.258065	0.407407	0.233333	0.225806	0.290323	0.3	0.290323	0.354839	0.290323	0.322581	0.266667	0.307692	0.259259	0.28	0.333333	0.36	0.291667	0.208333	0.166667	0.1	0.133333	0.0645161	–	0.0333333
Plenasium	Osmunda_vachellii	0.4	0.344828	0.310345	0.310345	0.3	0.275862	0.363636	0.423077	0.482759	0.413793	0.448276	0.413793	0.413793	0.448276	0.392857	0.464286	0.518519	0.48	0.366667	0.366667	0.517241	0.37931	0.333333	0.5	0.275862	0.266667	0.333333	0.310345	0.333333	0.366667	0.333333	0.366667	0.310345	0.36	0.230769	0.24	0.291667	0.375	0.26087	0.173913	0.133333	0.0666667	0.1	0.1	0.0333333	–
