# Supplementary material for: The fossil Osmundales (Royal Ferns)—a phylogenetic network analysis, revised taxonomy, and evolutionary classification of anatomically preserved trunks and rhizomes
Source: PeerJ. 2017 Jul 11;5:e3433. doi: 10.7717/peerj.3433 (PMC5508817; doi:10.7717/peerj.3433)
Supplement: Supplemental Information 14 [file peerj-05-3433-s014.xlsx]

## Sheet: Tabelle1
125	Grammatopteris_baldaufii	Grammatopteris_rigollotii	Grammatopteris_freitasii	Rastropteris_pinquanensis	Bathypteris_rhomboidea	Thamnopteris_diploxylon	Thamnopteris_gwynnevaughanii	Thamnopteris_kazanensis	Thamnopteris_kidstonii	Thamnopteris_uralica	Thamnopteris_gracilis	Thamnopteris_javorskii	Thamnopteris_schlechtendalii	Thamnopteris_splendida	Chasmatopteris_principalis	Grammatocaulis_donponii	Guairea_brasiliensis	Guairea_carnierii	Guairea_millerii	Lunea_jonesii	Donwelliacaulis_chlouberii	Itopsidema_vancleavei	Tiania_yunnanensis	Zhongmingella_plenasioides	Osmundacaulis_andrewii	Osmundacaulis_pruchnickii	Osmundacaulis_richmondii	Osmundacaulis_tasmanensis	Osmundacaulis_griggsii	Osmundacaulis_tehuelchensis	Osmundacaulis_atherstonei	Osmundacaulis_natalensis	Osmundacaulis_skidegatensis	Osmundacaulis_whittlesii	Osmundacaulis_hoskingii_var_hoskingii	Osmundacaulis_zululandensis	DEMO_Osmundacaulis_hoskingii_tabulatus	Osmundacaulis_jonesii	Osmundacaulis_lemonii	Osmundacaulis_nerii	Osmundacaulis_bamfordiae	Osmundacaulis_tidwellii	Shuichengella_primitiva	Palaeosmunda_playfordii	Palaeosmunda_williamsii	Millerocaulis_beipiaoensis	Millerocaulis_amarjolensis	Gen_indet_estipularis	Millerocaulis_stipabonettiorum
Grammatopteris_baldaufii	–	0.103448	0.1	0.137931	0.416667	0.470588	0.461538	0.466667	0.448276	0.444444	0.5	0.428571	0.464286	0.461538	0.538462	0.344828	0.5	0.5	0.473684	0.407407	0.565217	0.619048	0.619048	0.466667	0.517241	0.517241	0.482759	0.5	0.448276	0.482759	0.518519	0.5	0.482759	0.517241	0.448276	0.448276	0.482759	0.62069	0.482759	0.517241	0.555556	0.5	0.47619	0.571429	0.448276	0.518519	0.535714	0.583333	0.52381
Grammatopteris_rigollotii	0.103448	–	0	0.142857	0.375	0.5625	0.52	0.533333	0.5	0.5	0.588235	0.481481	0.555556	0.538462	0.576923	0.464286	0.5	0.555556	0.631579	0.518519	0.652174	0.65	0.714286	0.466667	0.551724	0.551724	0.517241	0.535714	0.482759	0.517241	0.555556	0.535714	0.517241	0.551724	0.482759	0.482759	0.517241	0.655172	0.551724	0.551724	0.62963	0.535714	0.6	0.642857	0.482759	0.592593	0.607143	0.666667	0.619048
Grammatopteris_freitasii	0.1	0	–	0.103448	0.375	0.529412	0.5	0.533333	0.517241	0.444444	0.5	0.5	0.535714	0.538462	0.576923	0.482759	0.5	0.5	0.631579	0.518519	0.652174	0.666667	0.666667	0.466667	0.517241	0.517241	0.482759	0.5	0.448276	0.482759	0.518519	0.5	0.482759	0.517241	0.448276	0.448276	0.482759	0.62069	0.517241	0.517241	0.592593	0.5	0.571429	0.607143	0.448276	0.555556	0.571429	0.666667	0.619048
Rastropteris_pinquanensis	0.137931	0.142857	0.103448	–	0.347826	0.375	0.4	0.466667	0.428571	0.294118	0.352941	0.407407	0.481481	0.44	0.52	0.428571	0.647059	0.588235	0.555556	0.461538	0.636364	0.65	0.6	0.642857	0.5	0.535714	0.5	0.518519	0.464286	0.5	0.538462	0.518519	0.5	0.535714	0.464286	0.464286	0.5	0.607143	0.464286	0.535714	0.538462	0.518519	0.55	0.555556	0.428571	0.5	0.518519	0.608696	0.55
Bathypteris_rhomboidea	0.416667	0.375	0.375	0.347826	–	0.125	0.12	0.133333	0.111111	0.111111	0.125	0.259259	0.148148	0.192308	0.269231	0.333333	0.529412	0.588235	0.444444	0.576923	0.681818	0.347826	0.473684	0.6	0.357143	0.428571	0.428571	0.407407	0.464286	0.428571	0.423077	0.407407	0.428571	0.464286	0.464286	0.464286	0.5	0.428571	0.321429	0.392857	0.37037	0.428571	0.411765	0.407407	0.428571	0.37037	0.407407	0.36	0.318182
Thamnopteris_diploxylon	0.470588	0.5625	0.529412	0.375	0.125	–	0	0	0	0	0.05	0.05	0.0526316	0.0555556	0.166667	0.2	0.625	0.5	0.411765	0.421053	0.533333	0.352941	0.368421	0.625	0.473684	0.578947	0.526316	0.5	0.578947	0.526316	0.555556	0.555556	0.578947	0.578947	0.578947	0.578947	0.578947	0.578947	0.421053	0.526316	0.578947	0.578947	0.5	0.315789	0.315789	0.333333	0.315789	0.388889	0.133333
Thamnopteris_gwynnevaughanii	0.461538	0.52	0.5	0.4	0.12	0	–	0	0.0606061	0	0.0526316	0.1875	0.0606061	0.142857	0.266667	0.275862	0.526316	0.526316	0.45	0.535714	0.636364	0.391304	0.428571	0.529412	0.375	0.4375	0.4375	0.419355	0.46875	0.483871	0.4	0.419355	0.4375	0.46875	0.53125	0.53125	0.5625	0.46875	0.375	0.4375	0.451613	0.46875	0.428571	0.366667	0.375	0.451613	0.466667	0.5	0.304348
Thamnopteris_kazanensis	0.466667	0.533333	0.533333	0.466667	0.133333	0	0	–	0.05	0	0	0.263158	0.05	0.176471	0.1	0.3125	0.375	0.375	0.25	0.529412	0.692308	0.384615	0.333333	0.571429	0.2	0.3	0.3	0.3	0.35	0.368421	0.263158	0.263158	0.3	0.35	0.4	0.4	0.45	0.3	0.3	0.35	0.263158	0.3	0.428571	0.222222	0.3	0.35	0.333333	0.3125	0.25
Thamnopteris_kidstonii	0.448276	0.5	0.517241	0.428571	0.111111	0	0.0606061	0.05	–	0	0.05	0.235294	0.0833333	0.16129	0.1875	0.28125	0.47619	0.428571	0.409091	0.59375	0.64	0.423077	0.375	0.555556	0.297297	0.351351	0.388889	0.342857	0.378378	0.361111	0.393939	0.382353	0.416667	0.444444	0.527778	0.527778	0.555556	0.378378	0.388889	0.416667	0.424242	0.485714	0.434783	0.352941	0.361111	0.4	0.371429	0.413793	0.307692
Thamnopteris_uralica	0.444444	0.5	0.444444	0.294118	0.111111	0	0	0	0	–	0	0.0476191	0.05	0.05	0.2	0.238095	0.647059	0.588235	0.5	0.45	0.5625	0.411765	0.4	0.625	0.428571	0.52381	0.47619	0.45	0.52381	0.47619	0.526316	0.5	0.52381	0.52381	0.52381	0.52381	0.52381	0.52381	0.380952	0.47619	0.52381	0.52381	0.421053	0.333333	0.285714	0.3	0.333333	0.45	0.176471
Thamnopteris_gracilis	0.5	0.588235	0.5	0.352941	0.125	0.05	0.0526316	0	0.05	0	–	0.0952381	0.1	0.0526316	0.157895	0.285714	0.588235	0.470588	0.388889	0.4	0.5	0.411765	0.35	0.588235	0.45	0.55	0.5	0.473684	0.55	0.5	0.526316	0.526316	0.55	0.55	0.6	0.6	0.6	0.55	0.4	0.5	0.6	0.6	0.421053	0.3	0.3	0.368421	0.35	0.388889	0.133333
Thamnopteris_javorskii	0.428571	0.481481	0.5	0.407407	0.259259	0.05	0.1875	0.263158	0.235294	0.0476191	0.0952381	–	0.176471	0.1	0.28125	0.322581	0.578947	0.578947	0.5	0.466667	0.541667	0.6	0.363636	0.555556	0.470588	0.529412	0.470588	0.454545	0.5	0.454545	0.46875	0.484849	0.5	0.441176	0.529412	0.5	0.529412	0.558824	0.441176	0.5	0.545455	0.529412	0.5	0.34375	0.264706	0.363636	0.40625	0.464286	0.24
Thamnopteris_schlechtendalii	0.464286	0.555556	0.535714	0.481481	0.148148	0.0526316	0.0606061	0.05	0.0833333	0.05	0.1	0.176471	–	0.0967742	0.28125	0.354839	0.473684	0.473684	0.45	0.566667	0.583333	0.44	0.363636	0.470588	0.314286	0.342857	0.411765	0.323529	0.371429	0.411765	0.375	0.393939	0.411765	0.441176	0.529412	0.529412	0.558824	0.4	0.411765	0.411765	0.454545	0.470588	0.428571	0.40625	0.382353	0.441176	0.454545	0.464286	0.36
Thamnopteris_splendida	0.461538	0.538462	0.538462	0.44	0.192308	0.0555556	0.142857	0.176471	0.16129	0.05	0.0526316	0.1	0.0967742	–	0.206897	0.3	0.578947	0.578947	0.45	0.535714	0.5	0.565217	0.409091	0.588235	0.40625	0.4375	0.451613	0.451613	0.46875	0.451613	0.448276	0.466667	0.483871	0.516129	0.548387	0.548387	0.580645	0.5	0.451613	0.483871	0.566667	0.548387	0.45	0.354839	0.354839	0.354839	0.34375	0.444444	0.28
Chasmatopteris_principalis	0.538462	0.576923	0.576923	0.52	0.269231	0.166667	0.266667	0.1	0.1875	0.2	0.157895	0.28125	0.28125	0.206897	–	0.413793	0.444444	0.444444	0.315789	0.517241	0.652174	0.608696	0.52381	0.4375	0.363636	0.393939	0.363636	0.40625	0.424242	0.40625	0.419355	0.40625	0.424242	0.424242	0.484849	0.454545	0.515151	0.424242	0.393939	0.363636	0.46875	0.393939	0.368421	0.322581	0.333333	0.40625	0.354839	0.37037	0.291667
Grammatocaulis_donponii	0.344828	0.464286	0.482759	0.428571	0.333333	0.2	0.275862	0.3125	0.28125	0.238095	0.285714	0.322581	0.354839	0.3	0.413793	–	0.571429	0.52381	0.454545	0.533333	0.615385	0.56	0.625	0.722222	0.53125	0.625	0.59375	0.6	0.625	0.5625	0.533333	0.548387	0.5625	0.65625	0.59375	0.59375	0.625	0.65625	0.53125	0.625	0.633333	0.580645	0.565217	0.40625	0.5	0.4	0.375	0.444444	0.291667
Guairea_brasiliensis	0.5	0.5	0.5	0.647059	0.529412	0.625	0.526316	0.375	0.47619	0.647059	0.588235	0.578947	0.473684	0.578947	0.444444	0.571429	–	0.0416667	0.125	0.291667	0.444444	0.5	0.409091	0.333333	0.181818	0.291667	0.166667	0.136364	0.25	0.208333	0.1	0.142857	0.25	0.227273	0.291667	0.272727	0.304348	0.291667	0.363636	0.291667	0.35	0.238095	0.409091	0.375	0.333333	0.363636	0.416667	0.380952	0.411765
Guairea_carnierii	0.5	0.555556	0.5	0.588235	0.588235	0.5	0.526316	0.375	0.428571	0.588235	0.470588	0.578947	0.473684	0.578947	0.444444	0.52381	0.0416667	–	0.0833333	0.291667	0.444444	0.5	0.363636	0.285714	0.181818	0.291667	0.166667	0.136364	0.25	0.208333	0.1	0.142857	0.25	0.227273	0.291667	0.272727	0.304348	0.291667	0.363636	0.291667	0.35	0.238095	0.409091	0.291667	0.291667	0.318182	0.333333	0.333333	0.352941
Guairea_millerii	0.473684	0.631579	0.631579	0.555556	0.444444	0.411765	0.45	0.25	0.409091	0.5	0.388889	0.5	0.45	0.45	0.315789	0.454545	0.125	0.0833333	–	0.2	0.421053	0.444444	0.434783	0.380952	0.26087	0.4	0.28	0.26087	0.36	0.32	0.238095	0.272727	0.36	0.347826	0.44	0.434783	0.458333	0.36	0.391304	0.4	0.380952	0.409091	0.434783	0.24	0.28	0.304348	0.32	0.227273	0.222222
Lunea_jonesii	0.407407	0.518519	0.518519	0.461538	0.576923	0.421053	0.535714	0.529412	0.59375	0.45	0.4	0.466667	0.566667	0.535714	0.517241	0.533333	0.291667	0.291667	0.2	–	0.346154	0.384615	0.36	0.238095	0.454545	0.485714	0.485714	0.484849	0.428571	0.514286	0.451613	0.46875	0.457143	0.393939	0.485714	0.424242	0.5	0.514286	0.454545	0.514286	0.5	0.46875	0.25	0.363636	0.228571	0.393939	0.424242	0.366667	0.416667
Donwelliacaulis_chlouberii	0.565217	0.652174	0.652174	0.636364	0.681818	0.533333	0.636364	0.692308	0.64	0.5625	0.5	0.541667	0.583333	0.5	0.652174	0.615385	0.444444	0.444444	0.421053	0.346154	–	0.25	0.35	0.533333	0.653846	0.615385	0.576923	0.583333	0.538462	0.576923	0.583333	0.6	0.576923	0.576923	0.653846	0.653846	0.692308	0.615385	0.615385	0.5	0.708333	0.72	0.333333	0.653846	0.538462	0.75	0.730769	0.666667	0.619048
Itopsidema_vancleavei	0.619048	0.65	0.666667	0.65	0.347826	0.352941	0.391304	0.384615	0.423077	0.411765	0.411765	0.6	0.44	0.565217	0.608696	0.56	0.5	0.5	0.444444	0.384615	0.25	–	0.25	0.5	0.576923	0.576923	0.576923	0.56	0.576923	0.576923	0.565217	0.583333	0.576923	0.576923	0.576923	0.576923	0.615385	0.576923	0.461538	0.5	0.52	0.576923	0.333333	0.56	0.5	0.56	0.6	0.458333	0.5
Tiania_yunnanensis	0.619048	0.714286	0.666667	0.6	0.473684	0.368421	0.428571	0.333333	0.375	0.4	0.35	0.363636	0.363636	0.409091	0.52381	0.625	0.409091	0.363636	0.434783	0.36	0.35	0.25	–	0.368421	0.4	0.4	0.36	0.347826	0.36	0.36	0.318182	0.347826	0.36	0.4	0.48	0.48	0.44	0.44	0.36	0.32	0.434783	0.458333	0.318182	0.44	0.32	0.391304	0.44	0.454545	0.315789
Zhongmingella_plenasioides	0.466667	0.466667	0.466667	0.642857	0.6	0.625	0.529412	0.571429	0.555556	0.625	0.588235	0.555556	0.470588	0.588235	0.4375	0.722222	0.333333	0.285714	0.380952	0.238095	0.533333	0.5	0.368421	–	0.368421	0.285714	0.380952	0.35	0.285714	0.428571	0.333333	0.333333	0.285714	0.210526	0.380952	0.368421	0.4	0.380952	0.421053	0.333333	0.444444	0.368421	0.25	0.428571	0.285714	0.5	0.47619	0.421053	0.466667
Osmundacaulis_andrewii	0.517241	0.551724	0.517241	0.5	0.357143	0.473684	0.375	0.2	0.297297	0.428571	0.45	0.470588	0.314286	0.40625	0.363636	0.53125	0.181818	0.181818	0.26087	0.454545	0.653846	0.576923	0.4	0.368421	–	0.0526316	0.0810811	0.0277778	0.0789474	0.108108	0.0588235	0.0571429	0.108108	0.162162	0.189189	0.189189	0.216216	0.131579	0.243243	0.243243	0.176471	0.25	0.391304	0.257143	0.297297	0.305556	0.305556	0.333333	0.296296
Osmundacaulis_pruchnickii	0.517241	0.551724	0.517241	0.535714	0.428571	0.578947	0.4375	0.3	0.351351	0.52381	0.55	0.529412	0.342857	0.4375	0.393939	0.625	0.291667	0.291667	0.4	0.485714	0.615385	0.576923	0.4	0.285714	0.0526316	–	0.102564	0.0789474	0.025	0.128205	0.0571429	0.0555556	0.0512821	0.108108	0.128205	0.135135	0.157895	0.1	0.216216	0.153846	0.176471	0.222222	0.36	0.405405	0.358974	0.394737	0.394737	0.46875	0.444444
Osmundacaulis_richmondii	0.482759	0.517241	0.482759	0.5	0.428571	0.526316	0.4375	0.3	0.388889	0.47619	0.5	0.470588	0.411765	0.451613	0.363636	0.59375	0.166667	0.166667	0.28	0.485714	0.576923	0.576923	0.36	0.380952	0.0810811	0.102564	–	0.0540541	0.0769231	0.0789474	0.0857143	0.0833333	0.128205	0.135135	0.128205	0.135135	0.157895	0.230769	0.216216	0.153846	0.205882	0.277778	0.4	0.378378	0.307692	0.405405	0.405405	0.40625	0.407407
Osmundacaulis_tasmanensis	0.5	0.535714	0.5	0.518519	0.407407	0.5	0.419355	0.3	0.342857	0.45	0.473684	0.454545	0.323529	0.451613	0.40625	0.6	0.136364	0.136364	0.26087	0.484849	0.583333	0.56	0.347826	0.35	0.0277778	0.0789474	0.0540541	–	0.0526316	0.0810811	0.0909091	0.0882353	0.135135	0.114286	0.189189	0.2	0.222222	0.184211	0.257143	0.189189	0.212121	0.285714	0.391304	0.371429	0.297297	0.405405	0.416667	0.387097	0.384615
Osmundacaulis_griggsii	0.448276	0.482759	0.448276	0.464286	0.464286	0.578947	0.46875	0.35	0.378378	0.52381	0.55	0.5	0.371429	0.46875	0.424242	0.625	0.25	0.25	0.36	0.428571	0.538462	0.576923	0.36	0.285714	0.0789474	0.025	0.0769231	0.0526316	–	0.102564	0.0857143	0.0833333	0.0769231	0.0810811	0.102564	0.108108	0.131579	0.125	0.189189	0.128205	0.176471	0.25	0.32	0.432432	0.333333	0.421053	0.421053	0.46875	0.481481
Osmundacaulis_tehuelchensis	0.482759	0.517241	0.482759	0.5	0.428571	0.526316	0.483871	0.368421	0.361111	0.47619	0.5	0.454545	0.411765	0.451613	0.40625	0.5625	0.208333	0.208333	0.32	0.514286	0.576923	0.576923	0.36	0.428571	0.108108	0.128205	0.0789474	0.0810811	0.102564	–	0.117647	0.114286	0.157895	0.166667	0.157895	0.166667	0.189189	0.205128	0.222222	0.157895	0.242424	0.257143	0.4	0.333333	0.315789	0.297297	0.324324	0.34375	0.384615
Osmundacaulis_atherstonei	0.518519	0.555556	0.518519	0.538462	0.423077	0.555556	0.4	0.263158	0.393939	0.526316	0.526316	0.46875	0.375	0.448276	0.419355	0.533333	0.1	0.1	0.238095	0.451613	0.583333	0.565217	0.318182	0.333333	0.0588235	0.0571429	0.0857143	0.0909091	0.0857143	0.117647	–	0	0	0.0588235	0.0857143	0.0882353	0.114286	0.0857143	0.176471	0.142857	0.125	0.151515	0.333333	0.272727	0.314286	0.363636	0.363636	0.392857	0.291667
Osmundacaulis_natalensis	0.5	0.535714	0.5	0.518519	0.407407	0.555556	0.419355	0.263158	0.382353	0.5	0.526316	0.484849	0.393939	0.466667	0.40625	0.548387	0.142857	0.142857	0.272727	0.46875	0.6	0.583333	0.347826	0.333333	0.0571429	0.0555556	0.0833333	0.0882353	0.0833333	0.114286	0	–	0	0.0571429	0.0833333	0.0857143	0.111111	0.0833333	0.171429	0.138889	0.121212	0.147059	0.318182	0.294118	0.333333	0.382353	0.382353	0.413793	0.32
Osmundacaulis_skidegatensis	0.482759	0.517241	0.482759	0.5	0.428571	0.578947	0.4375	0.3	0.416667	0.52381	0.55	0.5	0.411765	0.483871	0.424242	0.5625	0.25	0.25	0.36	0.457143	0.576923	0.576923	0.36	0.285714	0.108108	0.0512821	0.128205	0.135135	0.0769231	0.157895	0	0	–	0.0540541	0.0769231	0.0810811	0.105263	0.102564	0.162162	0.128205	0.117647	0.138889	0.32	0.351351	0.358974	0.432432	0.432432	0.46875	0.37037
Osmundacaulis_whittlesii	0.517241	0.551724	0.517241	0.535714	0.464286	0.578947	0.46875	0.35	0.444444	0.52381	0.55	0.441176	0.441176	0.516129	0.424242	0.65625	0.227273	0.227273	0.347826	0.393939	0.576923	0.576923	0.4	0.210526	0.162162	0.108108	0.135135	0.114286	0.0810811	0.166667	0.0588235	0.0571429	0.0540541	–	0.108108	0.108108	0.135135	0.135135	0.162162	0.108108	0.147059	0.138889	0.304348	0.342857	0.243243	0.428571	0.428571	0.4	0.444444
Osmundacaulis_hoskingii_var_hoskingii	0.448276	0.482759	0.448276	0.464286	0.464286	0.578947	0.53125	0.4	0.527778	0.52381	0.6	0.529412	0.529412	0.548387	0.484849	0.59375	0.291667	0.291667	0.44	0.485714	0.653846	0.576923	0.48	0.380952	0.189189	0.128205	0.128205	0.189189	0.102564	0.157895	0.0857143	0.0833333	0.0769231	0.108108	–	0	0.0263158	0.205128	0.108108	0.128205	0.147059	0.138889	0.44	0.432432	0.384615	0.405405	0.405405	0.46875	0.444444
Osmundacaulis_zululandensis	0.448276	0.482759	0.448276	0.464286	0.464286	0.578947	0.53125	0.4	0.527778	0.52381	0.6	0.5	0.529412	0.548387	0.454545	0.59375	0.272727	0.272727	0.434783	0.424242	0.653846	0.576923	0.48	0.368421	0.189189	0.135135	0.135135	0.2	0.108108	0.166667	0.0882353	0.0857143	0.0810811	0.108108	0	–	0.027027	0.189189	0.108108	0.135135	0.147059	0.111111	0.391304	0.4	0.324324	0.371429	0.371429	0.433333	0.444444
DEMO_Osmundacaulis_hoskingii_tabulatus	0.482759	0.517241	0.482759	0.5	0.5	0.578947	0.5625	0.45	0.555556	0.52381	0.6	0.529412	0.558824	0.580645	0.515151	0.625	0.304348	0.304348	0.458333	0.5	0.692308	0.615385	0.44	0.4	0.216216	0.157895	0.157895	0.222222	0.131579	0.189189	0.114286	0.111111	0.105263	0.135135	0.0263158	0.027027	–	0.210526	0.135135	0.157895	0.176471	0.166667	0.416667	0.444444	0.394737	0.361111	0.361111	0.483871	0.407407
Osmundacaulis_jonesii	0.62069	0.655172	0.62069	0.607143	0.428571	0.578947	0.46875	0.3	0.378378	0.52381	0.55	0.558824	0.4	0.5	0.424242	0.65625	0.291667	0.291667	0.36	0.514286	0.615385	0.576923	0.44	0.380952	0.131579	0.1	0.230769	0.184211	0.125	0.205128	0.0857143	0.0833333	0.102564	0.135135	0.205128	0.189189	0.210526	–	0.216216	0.179487	0.147059	0.222222	0.28	0.405405	0.410256	0.421053	0.421053	0.46875	0.481481
Osmundacaulis_lemonii	0.482759	0.551724	0.517241	0.464286	0.321429	0.421053	0.375	0.3	0.388889	0.380952	0.4	0.441176	0.411765	0.451613	0.393939	0.53125	0.363636	0.363636	0.391304	0.454545	0.615385	0.461538	0.36	0.421053	0.243243	0.216216	0.216216	0.257143	0.189189	0.222222	0.176471	0.171429	0.162162	0.162162	0.108108	0.108108	0.135135	0.216216	–	0.0810811	0.147059	0.138889	0.304348	0.371429	0.351351	0.371429	0.371429	0.433333	0.407407
Osmundacaulis_nerii	0.517241	0.551724	0.517241	0.535714	0.392857	0.526316	0.4375	0.35	0.416667	0.47619	0.5	0.5	0.411765	0.483871	0.363636	0.625	0.291667	0.291667	0.4	0.514286	0.5	0.5	0.32	0.333333	0.243243	0.153846	0.153846	0.189189	0.128205	0.157895	0.142857	0.138889	0.128205	0.108108	0.128205	0.135135	0.157895	0.179487	0.0810811	–	0.176471	0.138889	0.24	0.432432	0.358974	0.459459	0.459459	0.46875	0.481481
Osmundacaulis_bamfordiae	0.555556	0.62963	0.592593	0.538462	0.37037	0.578947	0.451613	0.263158	0.424242	0.52381	0.6	0.545455	0.454545	0.566667	0.46875	0.633333	0.35	0.35	0.380952	0.5	0.708333	0.52	0.434783	0.444444	0.176471	0.176471	0.205882	0.212121	0.176471	0.242424	0.125	0.121212	0.117647	0.147059	0.147059	0.147059	0.176471	0.147059	0.147059	0.176471	–	0.176471	0.380952	0.34375	0.382353	0.424242	0.4375	0.37931	0.4
Osmundacaulis_tidwellii	0.5	0.535714	0.5	0.518519	0.428571	0.578947	0.46875	0.3	0.485714	0.52381	0.6	0.529412	0.470588	0.548387	0.393939	0.580645	0.238095	0.238095	0.409091	0.46875	0.72	0.576923	0.458333	0.368421	0.25	0.222222	0.277778	0.285714	0.25	0.257143	0.151515	0.147059	0.138889	0.138889	0.138889	0.111111	0.166667	0.222222	0.138889	0.138889	0.176471	–	0.363636	0.323529	0.305556	0.342857	0.323529	0.433333	0.407407
Shuichengella_primitiva	0.47619	0.6	0.571429	0.55	0.411765	0.5	0.428571	0.428571	0.434783	0.421053	0.421053	0.5	0.428571	0.45	0.368421	0.565217	0.409091	0.409091	0.434783	0.25	0.333333	0.333333	0.318182	0.25	0.391304	0.36	0.4	0.391304	0.32	0.4	0.333333	0.318182	0.32	0.304348	0.44	0.391304	0.416667	0.28	0.304348	0.24	0.380952	0.363636	–	0.44	0.32	0.434783	0.48	0.454545	0.444444
Palaeosmunda_playfordii	0.571429	0.642857	0.607143	0.555556	0.407407	0.315789	0.366667	0.222222	0.352941	0.333333	0.3	0.34375	0.40625	0.354839	0.322581	0.40625	0.375	0.291667	0.24	0.363636	0.653846	0.56	0.44	0.428571	0.257143	0.405405	0.378378	0.371429	0.432432	0.333333	0.272727	0.294118	0.351351	0.342857	0.432432	0.4	0.444444	0.405405	0.371429	0.432432	0.34375	0.323529	0.44	–	0.0810811	0.171429	0.135135	0.0666667	0.0740741
Palaeosmunda_williamsii	0.448276	0.482759	0.448276	0.428571	0.428571	0.315789	0.375	0.3	0.361111	0.285714	0.3	0.264706	0.382353	0.354839	0.333333	0.5	0.333333	0.291667	0.28	0.228571	0.538462	0.5	0.32	0.285714	0.297297	0.358974	0.307692	0.297297	0.333333	0.315789	0.314286	0.333333	0.358974	0.243243	0.384615	0.324324	0.394737	0.410256	0.351351	0.358974	0.382353	0.305556	0.32	0.0810811	–	0.216216	0.216216	0.1875	0.185185
Millerocaulis_beipiaoensis	0.518519	0.592593	0.555556	0.5	0.37037	0.333333	0.451613	0.35	0.4	0.3	0.368421	0.363636	0.441176	0.354839	0.40625	0.4	0.363636	0.318182	0.304348	0.393939	0.75	0.56	0.391304	0.5	0.305556	0.394737	0.405405	0.405405	0.421053	0.297297	0.363636	0.382353	0.432432	0.428571	0.405405	0.371429	0.361111	0.421053	0.371429	0.459459	0.424242	0.342857	0.434783	0.171429	0.216216	–	0.0277778	0.16129	0.153846
Millerocaulis_amarjolensis	0.535714	0.607143	0.571429	0.518519	0.407407	0.315789	0.466667	0.333333	0.371429	0.333333	0.35	0.40625	0.454545	0.34375	0.354839	0.375	0.416667	0.333333	0.32	0.424242	0.730769	0.6	0.44	0.47619	0.305556	0.394737	0.405405	0.416667	0.421053	0.324324	0.363636	0.382353	0.432432	0.428571	0.405405	0.371429	0.361111	0.421053	0.371429	0.459459	0.4375	0.323529	0.48	0.135135	0.216216	0.0277778	–	0.166667	0.111111
Gen_indet_estipularis	0.583333	0.666667	0.666667	0.608696	0.36	0.388889	0.5	0.3125	0.413793	0.45	0.388889	0.464286	0.464286	0.444444	0.37037	0.444444	0.380952	0.333333	0.227273	0.366667	0.666667	0.458333	0.454545	0.421053	0.333333	0.46875	0.40625	0.387097	0.46875	0.34375	0.392857	0.413793	0.46875	0.4	0.46875	0.433333	0.483871	0.46875	0.433333	0.46875	0.37931	0.433333	0.454545	0.0666667	0.1875	0.16129	0.166667	–	0.217391
Millerocaulis_stipabonettiorum	0.52381	0.619048	0.619048	0.55	0.318182	0.133333	0.304348	0.25	0.307692	0.176471	0.133333	0.24	0.36	0.28	0.291667	0.291667	0.411765	0.352941	0.222222	0.416667	0.619048	0.5	0.315789	0.466667	0.296296	0.444444	0.407407	0.384615	0.481481	0.384615	0.291667	0.32	0.37037	0.444444	0.444444	0.444444	0.407407	0.481481	0.407407	0.481481	0.4	0.407407	0.444444	0.0740741	0.185185	0.153846	0.111111	0.217391	–
Millerocaulis_guptai	0.538462	0.615385	0.576923	0.52	0.37037	0.333333	0.357143	0.235294	0.34375	0.3	0.333333	0.3	0.366667	0.310345	0.344828	0.433333	0.454545	0.409091	0.347826	0.387097	0.666667	0.56	0.347826	0.421053	0.272727	0.4	0.371429	0.363636	0.428571	0.352941	0.290323	0.3125	0.371429	0.333333	0.428571	0.393939	0.382353	0.4	0.393939	0.428571	0.333333	0.3125	0.391304	0.0857143	0.114286	0.0909091	0.0857143	0.172414	0.0769231
Millerocaulis_websteri	0.535714	0.607143	0.571429	0.518519	0.37037	0.368421	0.4	0.277778	0.342857	0.333333	0.4	0.34375	0.393939	0.34375	0.387097	0.4375	0.458333	0.416667	0.36	0.393939	0.653846	0.56	0.36	0.47619	0.333333	0.421053	0.405405	0.388889	0.421053	0.351351	0.333333	0.352941	0.405405	0.4	0.486486	0.457143	0.444444	0.421053	0.457143	0.459459	0.3125	0.352941	0.4	0.135135	0.189189	0.111111	0.131579	0.166667	0.111111
Millerocaulis_spinksii	0.5	0.571429	0.535714	0.481481	0.333333	0.315789	0.366667	0.277778	0.352941	0.285714	0.35	0.3125	0.375	0.322581	0.387097	0.40625	0.458333	0.416667	0.36	0.393939	0.653846	0.52	0.32	0.47619	0.314286	0.432432	0.378378	0.371429	0.432432	0.388889	0.333333	0.323529	0.378378	0.371429	0.459459	0.428571	0.416667	0.432432	0.4	0.459459	0.28125	0.352941	0.36	0.162162	0.216216	0.171429	0.189189	0.2	0.111111
Millerocaulis_richmondii	0.586207	0.655172	0.62069	0.571429	0.392857	0.368421	0.4375	0.3	0.324324	0.380952	0.4	0.411765	0.4	0.40625	0.393939	0.46875	0.5	0.416667	0.36	0.428571	0.769231	0.576923	0.44	0.47619	0.289474	0.375	0.410256	0.368421	0.4	0.358974	0.371429	0.388889	0.435897	0.405405	0.487179	0.459459	0.447368	0.4	0.459459	0.487179	0.352941	0.416667	0.48	0.135135	0.205128	0.105263	0.105263	0.15625	0.148148
Millerocaulis_swanensis	0.586207	0.655172	0.62069	0.571429	0.392857	0.368421	0.46875	0.35	0.351351	0.380952	0.4	0.411765	0.428571	0.40625	0.393939	0.4375	0.458333	0.375	0.32	0.457143	0.730769	0.576923	0.4	0.47619	0.315789	0.4	0.435897	0.394737	0.425	0.333333	0.371429	0.388889	0.435897	0.405405	0.487179	0.459459	0.447368	0.4	0.459459	0.487179	0.352941	0.388889	0.44	0.135135	0.25641	0.131579	0.105263	0.125	0.148148
Millerocaulis_wadei	0.428571	0.5	0.464286	0.407407	0.37037	0.315789	0.419355	0.263158	0.333333	0.333333	0.35	0.352941	0.411765	0.419355	0.375	0.387097	0.347826	0.26087	0.25	0.382353	0.68	0.52	0.416667	0.47619	0.27027	0.384615	0.342105	0.297297	0.333333	0.210526	0.323529	0.314286	0.368421	0.333333	0.368421	0.333333	0.351351	0.384615	0.333333	0.394737	0.272727	0.314286	0.4	0.166667	0.210526	0.0810811	0.108108	0.0645161	0.153846
Millerocaulis_santaecrucis	0.454545	0.545455	0.545455	0.47619	0.272727	0.285714	0.416667	0.3125	0.285714	0.3125	0.333333	0.407407	0.37037	0.307692	0.28	0.375	0.388889	0.333333	0.263158	0.384615	0.7	0.45	0.388889	0.411765	0.275862	0.322581	0.333333	0.354839	0.322581	0.3	0.333333	0.357143	0.4	0.357143	0.333333	0.285714	0.310345	0.354839	0.285714	0.4	0.296296	0.357143	0.4	0.172414	0.266667	0.0666667	0.0666667	0.0769231	0.173913
Millerocaulis_herbstii	0.631579	0.631579	0.578947	0.611111	0.47619	0.272727	0.409091	0.285714	0.346154	0.307692	0.272727	0.347826	0.36	0.347826	0.347826	0.347826	0.5	0.375	0.4375	0.521739	0.65	0.736842	0.466667	0.461538	0.269231	0.357143	0.407407	0.384615	0.392857	0.37037	0.291667	0.32	0.37037	0.4	0.444444	0.4	0.384615	0.357143	0.48	0.481481	0.391304	0.375	0.333333	0.148148	0.259259	0.192308	0.142857	0.238095	0.105263
Millerocaulis_lutziae	0.45	0.55	0.55	0.473684	0.4	0.4375	0.571429	0.384615	0.5	0.4375	0.470588	0.416667	0.521739	0.416667	0.363636	0.458333	0.444444	0.444444	0.315789	0.307692	0.526316	0.421053	0.421053	0.5	0.36	0.481481	0.407407	0.384615	0.444444	0.37037	0.44	0.44	0.481481	0.36	0.444444	0.4	0.423077	0.481481	0.4	0.444444	0.304348	0.4	0.315789	0.148148	0.185185	0.185185	0.148148	0.12	0.210526
Millerocaulis_woolfei	0.482759	0.551724	0.517241	0.464286	0.357143	0.315789	0.419355	0.315789	0.4	0.285714	0.35	0.363636	0.393939	0.366667	0.40625	0.40625	0.416667	0.375	0.36	0.371429	0.692308	0.576923	0.4	0.428571	0.333333	0.421053	0.447368	0.416667	0.421053	0.342105	0.352941	0.371429	0.394737	0.416667	0.421053	0.388889	0.378378	0.421053	0.388889	0.447368	0.424242	0.314286	0.36	0.222222	0.263158	0.0833333	0.111111	0.21875	0.192308
Millerocaulis_broganii	0.482759	0.551724	0.517241	0.464286	0.357143	0.315789	0.40625	0.3	0.378378	0.285714	0.35	0.352941	0.4	0.375	0.424242	0.40625	0.416667	0.375	0.36	0.371429	0.692308	0.576923	0.4	0.428571	0.342105	0.4	0.461538	0.421053	0.4	0.333333	0.342857	0.361111	0.384615	0.405405	0.435897	0.405405	0.394737	0.4	0.405405	0.461538	0.411765	0.305556	0.36	0.216216	0.25641	0.105263	0.131579	0.21875	0.185185
Millerocaulis_tuhajkulensis	0.65	0.65	0.65	0.684211	0.5	0.461538	0.458333	0.266667	0.37037	0.466667	0.461538	0.423077	0.444444	0.44	0.36	0.391304	0.357143	0.285714	0.357143	0.478261	0.666667	0.636364	0.5	0.25	0.357143	0.321429	0.37037	0.333333	0.321429	0.259259	0.307692	0.333333	0.333333	0.296296	0.37037	0.37037	0.407407	0.357143	0.407407	0.37037	0.37037	0.296296	0.357143	0.2	0.296296	0.259259	0.230769	0.208333	0.3
Millerocaulis_aucklandicus	0.555556	0.62963	0.592593	0.538462	0.407407	0.315789	0.483871	0.368421	0.4	0.333333	0.35	0.382353	0.411765	0.354839	0.34375	0.433333	0.545455	0.454545	0.391304	0.424242	0.708333	0.6	0.478261	0.47619	0.333333	0.368421	0.378378	0.378378	0.342105	0.297297	0.393939	0.411765	0.432432	0.4	0.378378	0.342857	0.361111	0.394737	0.371429	0.405405	0.333333	0.4	0.416667	0.228571	0.297297	0.189189	0.166667	0.16129	0.269231
Millerocaulis_gibbianus	0.482759	0.551724	0.517241	0.464286	0.428571	0.421053	0.5	0.45	0.472222	0.380952	0.45	0.382353	0.457143	0.46875	0.484849	0.53125	0.565217	0.521739	0.458333	0.382353	0.615385	0.52	0.333333	0.45	0.351351	0.384615	0.421053	0.405405	0.358974	0.368421	0.371429	0.388889	0.394737	0.361111	0.394737	0.361111	0.351351	0.384615	0.388889	0.421053	0.294118	0.4	0.333333	0.25	0.236842	0.27027	0.27027	0.225806	0.269231
Millerocaulis_hebeiensis	0.538462	0.615385	0.615385	0.56	0.346154	0.388889	0.5	0.368421	0.441176	0.4	0.421053	0.424242	0.484849	0.387097	0.290323	0.37931	0.428571	0.380952	0.318182	0.375	0.73913	0.583333	0.5	0.4	0.4	0.405405	0.444444	0.472222	0.432432	0.388889	0.40625	0.424242	0.444444	0.382353	0.416667	0.352941	0.4	0.432432	0.382353	0.444444	0.40625	0.294118	0.391304	0.176471	0.277778	0.138889	0.114286	0.129032	0.230769
Millerocaulis_macromedullosus	0.5	0.576923	0.538462	0.48	0.384615	0.368421	0.413793	0.235294	0.363636	0.333333	0.4	0.375	0.40625	0.354839	0.4	0.366667	0.363636	0.363636	0.347826	0.419355	0.708333	0.583333	0.434783	0.571429	0.205882	0.333333	0.371429	0.342857	0.361111	0.257143	0.258065	0.28125	0.342857	0.393939	0.371429	0.333333	0.352941	0.333333	0.363636	0.457143	0.322581	0.30303	0.458333	0.142857	0.2	0.0857143	0.0833333	0.206897	0.115385
Millerocaulis_patagonicus	0.5	0.571429	0.535714	0.481481	0.428571	0.421053	0.516129	0.421053	0.485714	0.380952	0.45	0.424242	0.470588	0.4375	0.40625	0.46875	0.434783	0.434783	0.416667	0.424242	0.692308	0.6	0.416667	0.55	0.305556	0.368421	0.324324	0.361111	0.342105	0.324324	0.352941	0.371429	0.405405	0.371429	0.324324	0.285714	0.277778	0.394737	0.314286	0.378378	0.333333	0.352941	0.416667	0.25	0.27027	0.194444	0.189189	0.2	0.269231
Millerocaulis_wrightii	0.518519	0.592593	0.555556	0.5	0.407407	0.368421	0.516129	0.421053	0.428571	0.380952	0.4	0.411765	0.5	0.419355	0.34375	0.466667	0.5	0.409091	0.347826	0.454545	0.708333	0.56	0.434783	0.52381	0.333333	0.394737	0.324324	0.378378	0.368421	0.27027	0.393939	0.382353	0.432432	0.4	0.378378	0.342857	0.361111	0.421053	0.371429	0.405405	0.30303	0.4	0.416667	0.2	0.27027	0.189189	0.166667	0.129032	0.230769
Millerocaulis_chubutensis	0.555556	0.62963	0.592593	0.538462	0.296296	0.263158	0.419355	0.368421	0.323529	0.285714	0.3	0.352941	0.382353	0.322581	0.375	0.4	0.526316	0.421053	0.35	0.466667	0.666667	0.458333	0.363636	0.5	0.342857	0.342857	0.323529	0.323529	0.314286	0.264706	0.375	0.393939	0.411765	0.382353	0.352941	0.352941	0.352941	0.4	0.294118	0.352941	0.333333	0.441176	0.428571	0.25	0.323529	0.176471	0.181818	0.142857	0.2
Millerocaulis_donponii	0.576923	0.653846	0.615385	0.56	0.307692	0.315789	0.413793	0.352941	0.333333	0.285714	0.35	0.375	0.375	0.258065	0.366667	0.366667	0.454545	0.454545	0.391304	0.451613	0.666667	0.5	0.347826	0.571429	0.294118	0.361111	0.371429	0.371429	0.388889	0.342857	0.354839	0.375	0.428571	0.424242	0.428571	0.393939	0.411765	0.388889	0.333333	0.428571	0.322581	0.393939	0.416667	0.2	0.285714	0.142857	0.138889	0.206897	0.153846
Millerocaulis_dunlopii	0.538462	0.615385	0.576923	0.52	0.4	0.25	0.464286	0.388889	0.375	0.277778	0.294118	0.366667	0.387097	0.344828	0.333333	0.448276	0.6	0.5	0.428571	0.433333	0.695652	0.545455	0.428571	0.470588	0.333333	0.371429	0.382353	0.382353	0.342857	0.352941	0.40625	0.424242	0.441176	0.375	0.382353	0.34375	0.333333	0.4	0.34375	0.382353	0.333333	0.387097	0.380952	0.212121	0.264706	0.181818	0.147059	0.148148	0.217391
Millerocaulis_juandahensis	0.555556	0.62963	0.592593	0.538462	0.333333	0.263158	0.419355	0.368421	0.314286	0.285714	0.3	0.323529	0.382353	0.322581	0.40625	0.333333	0.45	0.35	0.333333	0.483871	0.708333	0.52	0.347826	0.526316	0.333333	0.388889	0.428571	0.371429	0.416667	0.342857	0.375	0.393939	0.428571	0.457143	0.457143	0.457143	0.457143	0.416667	0.4	0.485714	0.393939	0.428571	0.454545	0.181818	0.285714	0.142857	0.147059	0.206897	0.115385
Millerocaulis_limewoodensis	0.538462	0.615385	0.576923	0.52	0.307692	0.263158	0.433333	0.421053	0.393939	0.285714	0.3	0.333333	0.393939	0.333333	0.375	0.37931	0.55	0.45	0.380952	0.451613	0.695652	0.521739	0.380952	0.526316	0.382353	0.444444	0.4	0.4	0.416667	0.4	0.4375	0.454545	0.485714	0.424242	0.428571	0.393939	0.411765	0.472222	0.333333	0.428571	0.375	0.454545	0.409091	0.242424	0.314286	0.257143	0.235294	0.172414	0.208333
Millerocaulis_australis	0.5	0.576923	0.538462	0.48	0.384615	0.333333	0.482759	0.352941	0.382353	0.35	0.368421	0.40625	0.46875	0.37931	0.333333	0.37931	0.409091	0.318182	0.304348	0.4375	0.695652	0.56	0.391304	0.5	0.342857	0.405405	0.333333	0.4	0.378378	0.277778	0.34375	0.363636	0.416667	0.441176	0.388889	0.352941	0.371429	0.432432	0.382353	0.416667	0.375	0.363636	0.416667	0.205882	0.277778	0.114286	0.114286	0.133333	0.166667
Millerocaulis_indica	0.592593	0.666667	0.62963	0.576923	0.307692	0.263158	0.413793	0.388889	0.30303	0.285714	0.3	0.354839	0.375	0.258065	0.354839	0.354839	0.6	0.5	0.428571	0.517241	0.72	0.565217	0.391304	0.529412	0.352941	0.352941	0.393939	0.40625	0.382353	0.363636	0.387097	0.40625	0.424242	0.454545	0.424242	0.424242	0.393939	0.411765	0.363636	0.424242	0.387097	0.4375	0.47619	0.212121	0.333333	0.15625	0.117647	0.230769	0.12
Millerocaulis_kolbei	0.5	0.571429	0.535714	0.481481	0.444444	0.421053	0.433333	0.277778	0.428571	0.380952	0.45	0.40625	0.393939	0.375	0.387097	0.34375	0.541667	0.541667	0.52	0.424242	0.576923	0.56	0.52	0.571429	0.333333	0.342105	0.459459	0.444444	0.368421	0.432432	0.333333	0.352941	0.351351	0.371429	0.378378	0.342857	0.388889	0.342105	0.371429	0.432432	0.3125	0.323529	0.36	0.243243	0.297297	0.305556	0.289474	0.3	0.333333
Millerocaulis_livingstonensis	0.5	0.571429	0.535714	0.481481	0.333333	0.368421	0.433333	0.333333	0.342857	0.333333	0.4	0.40625	0.393939	0.28125	0.354839	0.40625	0.416667	0.375	0.32	0.363636	0.615385	0.52	0.4	0.47619	0.333333	0.394737	0.378378	0.388889	0.394737	0.324324	0.363636	0.382353	0.432432	0.428571	0.459459	0.428571	0.472222	0.421053	0.428571	0.432432	0.34375	0.352941	0.4	0.162162	0.216216	0.111111	0.131579	0.133333	0.222222
Millerocaulis_rajmahalensis	0.62069	0.689655	0.655172	0.607143	0.392857	0.368421	0.5	0.35	0.378378	0.380952	0.4	0.441176	0.457143	0.40625	0.30303	0.46875	0.458333	0.375	0.36	0.485714	0.807692	0.576923	0.44	0.47619	0.368421	0.425	0.435897	0.447368	0.45	0.358974	0.428571	0.444444	0.487179	0.432432	0.461538	0.405405	0.421053	0.4	0.405405	0.461538	0.411765	0.333333	0.48	0.189189	0.282051	0.105263	0.0789474	0.15625	0.222222
Millerocaulis_sahnii	0.555556	0.62963	0.592593	0.538462	0.423077	0.368421	0.517241	0.411765	0.382353	0.380952	0.4	0.40625	0.46875	0.354839	0.366667	0.451613	0.521739	0.434783	0.375	0.4375	0.68	0.583333	0.458333	0.52381	0.314286	0.378378	0.333333	0.371429	0.351351	0.277778	0.375	0.393939	0.444444	0.411765	0.388889	0.352941	0.371429	0.405405	0.382353	0.416667	0.322581	0.424242	0.48	0.166667	0.222222	0.142857	0.108108	0.137931	0.192308
DEMO_Millercaulis_zamunerae	0.551724	0.62069	0.586207	0.535714	0.428571	0.421053	0.53125	0.45	0.459459	0.380952	0.45	0.411765	0.485714	0.4375	0.454545	0.5	0.375	0.375	0.36	0.428571	0.730769	0.576923	0.44	0.47619	0.315789	0.4	0.333333	0.342105	0.375	0.333333	0.371429	0.388889	0.435897	0.351351	0.358974	0.324324	0.315789	0.425	0.351351	0.435897	0.352941	0.388889	0.48	0.243243	0.282051	0.157895	0.157895	0.1875	0.259259
DEMO_Millercaulis_australis_Vera2010	0.407407	0.481481	0.444444	0.384615	0.423077	0.388889	0.448276	0.388889	0.424242	0.4	0.421053	0.387097	0.46875	0.448276	0.451613	0.366667	0.368421	0.263158	0.25	0.433333	0.791667	0.652174	0.590909	0.375	0.323529	0.411765	0.363636	0.34375	0.382353	0.323529	0.354839	0.375	0.393939	0.363636	0.333333	0.333333	0.363636	0.441176	0.363636	0.454545	0.387097	0.40625	0.55	0.225806	0.272727	0.21875	0.1875	0.185185	0.26087
Osmunda_johnstonii	0.62069	0.689655	0.655172	0.607143	0.357143	0.368421	0.4375	0.35	0.351351	0.333333	0.4	0.411765	0.4	0.40625	0.454545	0.53125	0.5	0.458333	0.4	0.457143	0.730769	0.5	0.4	0.47619	0.315789	0.4	0.435897	0.394737	0.425	0.333333	0.371429	0.388889	0.435897	0.405405	0.487179	0.459459	0.447368	0.4	0.459459	0.487179	0.352941	0.416667	0.44	0.135135	0.205128	0.131579	0.157895	0.09375	0.185185
Osmunda_beardmorensis	0.62963	0.703704	0.666667	0.615385	0.407407	0.263158	0.428571	0.3125	0.387097	0.285714	0.3	0.366667	0.4	0.333333	0.344828	0.354839	0.565217	0.478261	0.416667	0.4375	0.68	0.56	0.458333	0.47619	0.40625	0.470588	0.5	0.484849	0.5	0.470588	0.433333	0.451613	0.470588	0.4375	0.5	0.46875	0.454545	0.470588	0.4375	0.5	0.4	0.40625	0.375	0.117647	0.235294	0.181818	0.147059	0.166667	0.16
Osmunda_indentata	0.517241	0.586207	0.551724	0.5	0.285714	0.263158	0.40625	0.4	0.324324	0.238095	0.3	0.382353	0.371429	0.28125	0.393939	0.375	0.409091	0.363636	0.347826	0.454545	0.615385	0.423077	0.32	0.526316	0.368421	0.394737	0.378378	0.388889	0.394737	0.324324	0.382353	0.4	0.432432	0.486486	0.432432	0.432432	0.459459	0.447368	0.378378	0.432432	0.411765	0.416667	0.391304	0.228571	0.297297	0.194444	0.222222	0.166667	0.222222
Osmunda_preosmunda	0.62963	0.703704	0.666667	0.615385	0.333333	0.263158	0.451613	0.421053	0.371429	0.285714	0.3	0.382353	0.411765	0.322581	0.40625	0.4	0.55	0.45	0.380952	0.451613	0.708333	0.52	0.391304	0.473684	0.388889	0.361111	0.428571	0.428571	0.388889	0.371429	0.40625	0.424242	0.428571	0.457143	0.428571	0.428571	0.428571	0.416667	0.371429	0.428571	0.393939	0.457143	0.409091	0.212121	0.314286	0.171429	0.205882	0.172414	0.192308
Osmunda_wangii	0.607143	0.678571	0.642857	0.592593	0.428571	0.368421	0.5	0.4	0.416667	0.380952	0.4	0.382353	0.457143	0.46875	0.424242	0.516129	0.521739	0.434783	0.375	0.382353	0.72	0.576923	0.458333	0.428571	0.378378	0.410256	0.447368	0.394737	0.384615	0.342105	0.411765	0.428571	0.447368	0.361111	0.447368	0.416667	0.405405	0.410256	0.416667	0.447368	0.352941	0.388889	0.416667	0.166667	0.210526	0.184211	0.189189	0.09375	0.222222
Osmunda_pulchella	0.586207	0.655172	0.62069	0.571429	0.392857	0.368421	0.483871	0.368421	0.388889	0.380952	0.4	0.454545	0.470588	0.451613	0.40625	0.4375	0.416667	0.333333	0.32	0.457143	0.730769	0.538462	0.4	0.47619	0.378378	0.461538	0.421053	0.432432	0.461538	0.358974	0.382353	0.4	0.447368	0.444444	0.473684	0.444444	0.432432	0.461538	0.444444	0.473684	0.363636	0.4	0.44	0.138889	0.263158	0.108108	0.135135	0.0625	0.153846
Osmunda_sinica	0.62963	0.703704	0.666667	0.615385	0.333333	0.263158	0.451613	0.421053	0.371429	0.285714	0.3	0.382353	0.441176	0.354839	0.40625	0.4	0.5	0.409091	0.347826	0.454545	0.708333	0.48	0.347826	0.52381	0.388889	0.447368	0.432432	0.459459	0.473684	0.405405	0.424242	0.441176	0.486486	0.485714	0.486486	0.457143	0.472222	0.473684	0.4	0.486486	0.393939	0.485714	0.416667	0.171429	0.27027	0.162162	0.194444	0.129032	0.153846
Osmunda_chengii	0.655172	0.724138	0.689655	0.642857	0.392857	0.368421	0.46875	0.35	0.378378	0.380952	0.4	0.441176	0.428571	0.4375	0.424242	0.5	0.583333	0.5	0.44	0.514286	0.769231	0.576923	0.48	0.52381	0.315789	0.375	0.435897	0.421053	0.4	0.333333	0.342857	0.361111	0.410256	0.432432	0.461538	0.432432	0.421053	0.375	0.459459	0.487179	0.323529	0.444444	0.48	0.162162	0.282051	0.184211	0.184211	0.125	0.185185
Osmunda_liaoningensis	0.517241	0.586207	0.551724	0.5	0.464286	0.368421	0.5	0.4	0.432432	0.380952	0.4	0.411765	0.485714	0.46875	0.484849	0.4375	0.458333	0.375	0.36	0.342857	0.692308	0.576923	0.4	0.380952	0.368421	0.375	0.512821	0.473684	0.4	0.384615	0.371429	0.388889	0.384615	0.378378	0.410256	0.378378	0.368421	0.375	0.378378	0.461538	0.352941	0.333333	0.36	0.162162	0.205128	0.105263	0.131579	0.15625	0.185185
Osmunda_plumites	0.62069	0.655172	0.655172	0.642857	0.37037	0.388889	0.516129	0.4	0.361111	0.4	0.421053	0.393939	0.470588	0.419355	0.4375	0.451613	0.391304	0.391304	0.291667	0.411765	0.730769	0.56	0.416667	0.4	0.378378	0.461538	0.473684	0.432432	0.461538	0.394737	0.411765	0.428571	0.473684	0.472222	0.552632	0.527778	0.513514	0.461538	0.527778	0.552632	0.393939	0.485714	0.44	0.166667	0.263158	0.135135	0.189189	0.0967742	0.148148
Osmunda_tekelili	0.481481	0.555556	0.518519	0.461538	0.407407	0.333333	0.466667	0.368421	0.411765	0.3	0.368421	0.375	0.454545	0.354839	0.375	0.387097	0.35	0.35	0.333333	0.366667	0.68	0.583333	0.478261	0.588235	0.314286	0.342857	0.352941	0.393939	0.342857	0.264706	0.3125	0.333333	0.352941	0.441176	0.352941	0.323529	0.382353	0.4	0.382353	0.411765	0.375	0.30303	0.428571	0.212121	0.205882	0.121212	0.176471	0.185185	0.24
Osmunda_burgii	0.538462	0.538462	0.5	0.6	0.5	0.473684	0.517241	0.411765	0.515151	0.428571	0.5	0.5	0.46875	0.451613	0.5	0.5	0.363636	0.318182	0.478261	0.483871	0.708333	0.583333	0.434783	0.47619	0.323529	0.416667	0.4	0.428571	0.444444	0.371429	0.354839	0.375	0.428571	0.484849	0.4	0.363636	0.382353	0.472222	0.454545	0.485714	0.483871	0.363636	0.458333	0.228571	0.228571	0.228571	0.222222	0.275862	0.269231
Osmunda_dakotensis	0.576923	0.576923	0.538462	0.64	0.538462	0.526316	0.482759	0.294118	0.516129	0.47619	0.55	0.46875	0.483871	0.5	0.5	0.5	0.333333	0.333333	0.5	0.5	0.75	0.652174	0.5	0.5	0.28125	0.382353	0.382353	0.393939	0.411765	0.333333	0.258065	0.28125	0.323529	0.375	0.352941	0.3125	0.333333	0.411765	0.40625	0.441176	0.387097	0.28125	0.478261	0.176471	0.205882	0.242424	0.235294	0.285714	0.2
Osmunda_nebraskensis	0.555556	0.555556	0.518519	0.615385	0.481481	0.526316	0.483871	0.315789	0.457143	0.47619	0.55	0.454545	0.441176	0.516129	0.46875	0.5	0.304348	0.304348	0.458333	0.5	0.76	0.576923	0.5	0.52381	0.25	0.368421	0.378378	0.351351	0.394737	0.27027	0.272727	0.294118	0.351351	0.371429	0.378378	0.314286	0.388889	0.394737	0.428571	0.459459	0.393939	0.285714	0.5	0.228571	0.243243	0.243243	0.25	0.258065	0.296296
Osmunda_embreei	0.592593	0.666667	0.62963	0.576923	0.37037	0.210526	0.451613	0.421053	0.342857	0.238095	0.25	0.323529	0.411765	0.322581	0.34375	0.4	0.5	0.409091	0.347826	0.424242	0.666667	0.48	0.347826	0.52381	0.388889	0.447368	0.405405	0.405405	0.421053	0.351351	0.454545	0.470588	0.513514	0.428571	0.459459	0.4	0.444444	0.473684	0.371429	0.459459	0.393939	0.457143	0.416667	0.2	0.243243	0.216216	0.194444	0.129032	0.192308
Osmunda_cinnamomea_Cretaceous_Canada	0.5	0.571429	0.571429	0.518519	0.444444	0.444444	0.580645	0.55	0.472222	0.4	0.473684	0.454545	0.529412	0.4375	0.46875	0.548387	0.478261	0.478261	0.375	0.352941	0.6	0.48	0.333333	0.4	0.459459	0.461538	0.447368	0.459459	0.410256	0.368421	0.470588	0.485714	0.5	0.444444	0.473684	0.444444	0.432432	0.487179	0.444444	0.447368	0.393939	0.428571	0.333333	0.25	0.236842	0.189189	0.216216	0.15625	0.296296
Todea_tidwellii	0.423077	0.5	0.461538	0.4	0.4	0.368421	0.481481	0.333333	0.483871	0.380952	0.4	0.37931	0.482759	0.444444	0.428571	0.448276	0.416667	0.375	0.36	0.272727	0.583333	0.48	0.4	0.428571	0.40625	0.470588	0.470588	0.46875	0.441176	0.382353	0.366667	0.387097	0.411765	0.375	0.411765	0.34375	0.424242	0.470588	0.375	0.441176	0.4	0.290323	0.4	0.21875	0.176471	0.1875	0.21875	0.16129	0.304348
Osmunda_bransonii	0.576923	0.576923	0.538462	0.64	0.576923	0.5	0.533333	0.388889	0.529412	0.45	0.526316	0.424242	0.484849	0.566667	0.516129	0.551724	0.285714	0.285714	0.5	0.5	0.75	0.625	0.454545	0.5	0.285714	0.405405	0.361111	0.333333	0.378378	0.277778	0.3125	0.333333	0.388889	0.352941	0.361111	0.294118	0.342857	0.432432	0.411765	0.444444	0.40625	0.323529	0.478261	0.264706	0.222222	0.305556	0.314286	0.266667	0.32
Osmunda_moorei	0.535714	0.535714	0.5	0.592593	0.428571	0.526316	0.4375	0.25	0.416667	0.47619	0.55	0.470588	0.4	0.46875	0.484849	0.483871	0.347826	0.347826	0.5	0.5	0.76	0.576923	0.541667	0.47619	0.243243	0.282051	0.368421	0.342105	0.307692	0.236842	0.235294	0.257143	0.289474	0.333333	0.315789	0.277778	0.324324	0.307692	0.361111	0.394737	0.352941	0.277778	0.458333	0.277778	0.315789	0.210526	0.243243	0.28125	0.333333
Osmunda_crossii	0.555556	0.555556	0.518519	0.615385	0.518519	0.473684	0.466667	0.277778	0.454545	0.47619	0.5	0.46875	0.46875	0.483871	0.451613	0.451613	0.304348	0.217391	0.416667	0.5	0.72	0.6	0.458333	0.428571	0.264706	0.388889	0.361111	0.371429	0.416667	0.314286	0.25	0.272727	0.333333	0.382353	0.361111	0.323529	0.371429	0.416667	0.411765	0.444444	0.375	0.294118	0.458333	0.138889	0.194444	0.257143	0.222222	0.233333	0.185185
Osmunda_arnoldii	0.551724	0.551724	0.517241	0.607143	0.535714	0.473684	0.5	0.35	0.5	0.47619	0.5	0.5	0.5	0.548387	0.454545	0.5625	0.375	0.291667	0.48	0.485714	0.769231	0.615385	0.48	0.380952	0.351351	0.410256	0.333333	0.378378	0.384615	0.342105	0.342857	0.361111	0.410256	0.351351	0.333333	0.297297	0.289474	0.487179	0.351351	0.384615	0.441176	0.333333	0.48	0.243243	0.230769	0.243243	0.216216	0.25	0.296296
ALT2_Osmunda_dowkeri_CHANDLER	0.551724	0.551724	0.517241	0.607143	0.535714	0.473684	0.53125	0.4	0.527778	0.47619	0.5	0.441176	0.529412	0.516129	0.424242	0.53125	0.375	0.291667	0.48	0.485714	0.730769	0.615385	0.52	0.428571	0.351351	0.410256	0.333333	0.405405	0.384615	0.289474	0.314286	0.333333	0.384615	0.351351	0.307692	0.243243	0.315789	0.461538	0.351351	0.384615	0.411765	0.305556	0.48	0.243243	0.230769	0.297297	0.27027	0.25	0.333333
ALT2_Osmunda_chandleri	0.538462	0.538462	0.5	0.56	0.461538	0.421053	0.448276	0.294118	0.441176	0.428571	0.45	0.4375	0.40625	0.533333	0.466667	0.5	0.391304	0.304348	0.458333	0.484849	0.76	0.6	0.458333	0.428571	0.228571	0.324324	0.305556	0.285714	0.297297	0.25	0.21875	0.242424	0.305556	0.294118	0.277778	0.235294	0.257143	0.351351	0.323529	0.361111	0.322581	0.30303	0.44	0.228571	0.222222	0.257143	0.25	0.206897	0.269231
Osmunda_oregonensis	0.551724	0.62069	0.586207	0.535714	0.428571	0.315789	0.46875	0.35	0.444444	0.333333	0.35	0.382353	0.457143	0.5	0.454545	0.46875	0.478261	0.391304	0.375	0.441176	0.730769	0.56	0.458333	0.5	0.297297	0.410256	0.394737	0.378378	0.384615	0.315789	0.342857	0.361111	0.394737	0.388889	0.368421	0.333333	0.324324	0.410256	0.361111	0.447368	0.382353	0.4	0.458333	0.166667	0.210526	0.189189	0.189189	0.129032	0.153846
Osmunda_pluma	0.551724	0.62069	0.586207	0.535714	0.464286	0.315789	0.53125	0.45	0.472222	0.333333	0.35	0.382353	0.542857	0.46875	0.454545	0.46875	0.434783	0.347826	0.333333	0.382353	0.730769	0.6	0.458333	0.45	0.405405	0.461538	0.421053	0.459459	0.435897	0.342105	0.428571	0.444444	0.473684	0.416667	0.394737	0.361111	0.351351	0.487179	0.361111	0.447368	0.470588	0.4	0.458333	0.166667	0.184211	0.0810811	0.108108	0.129032	0.192308
Osmunda_precinnamomea	0.5	0.571429	0.571429	0.518519	0.444444	0.444444	0.580645	0.55	0.527778	0.4	0.473684	0.454545	0.529412	0.46875	0.46875	0.548387	0.478261	0.478261	0.375	0.352941	0.6	0.48	0.333333	0.4	0.459459	0.487179	0.447368	0.459459	0.435897	0.421053	0.470588	0.485714	0.5	0.444444	0.473684	0.444444	0.432432	0.512821	0.444444	0.447368	0.393939	0.428571	0.333333	0.25	0.236842	0.243243	0.27027	0.15625	0.296296
Osmunda_cinnamomea_Neogene_USA	0.535714	0.607143	0.607143	0.555556	0.407407	0.444444	0.548387	0.5	0.472222	0.4	0.473684	0.484849	0.5	0.40625	0.4375	0.516129	0.545455	0.545455	0.434783	0.363636	0.64	0.52	0.375	0.315789	0.459459	0.394737	0.486486	0.5	0.394737	0.405405	0.441176	0.457143	0.432432	0.444444	0.459459	0.444444	0.432432	0.447368	0.444444	0.432432	0.393939	0.371429	0.304348	0.257143	0.297297	0.194444	0.222222	0.193548	0.296296
Osmunda_cinnamomea_Neogene_Japan	0.6	0.68	0.68	0.625	0.44	0.411765	0.586207	0.5	0.454545	0.421053	0.444444	0.483871	0.53125	0.433333	0.4	0.5	0.5	0.45	0.333333	0.433333	0.727273	0.541667	0.409091	0.388889	0.411765	0.428571	0.441176	0.441176	0.428571	0.352941	0.46875	0.484849	0.5	0.454545	0.470588	0.454545	0.441176	0.485714	0.454545	0.470588	0.40625	0.424242	0.428571	0.15625	0.264706	0.147059	0.121212	0.1	0.2
Osmunda_iliaensis	0.586207	0.655172	0.62069	0.571429	0.428571	0.315789	0.5	0.4	0.432432	0.333333	0.35	0.441176	0.485714	0.4375	0.393939	0.4375	0.416667	0.333333	0.32	0.457143	0.769231	0.576923	0.44	0.47619	0.342105	0.45	0.435897	0.447368	0.475	0.358974	0.4	0.416667	0.461538	0.459459	0.435897	0.405405	0.394737	0.475	0.405405	0.487179	0.470588	0.361111	0.48	0.135135	0.230769	0.105263	0.0789474	0.125	0.148148
Osmunda_shimokawaensis	0.571429	0.642857	0.607143	0.555556	0.392857	0.315789	0.46875	0.35	0.416667	0.333333	0.35	0.441176	0.485714	0.4375	0.393939	0.419355	0.434783	0.347826	0.333333	0.470588	0.76	0.538462	0.416667	0.52381	0.324324	0.410256	0.394737	0.447368	0.435897	0.315789	0.352941	0.371429	0.421053	0.472222	0.394737	0.361111	0.351351	0.435897	0.388889	0.473684	0.411765	0.388889	0.458333	0.166667	0.263158	0.105263	0.108108	0.125	0.148148
Osmunda_wehrii	0.551724	0.62069	0.586207	0.535714	0.392857	0.368421	0.5	0.45	0.459459	0.333333	0.4	0.411765	0.485714	0.4375	0.454545	0.53125	0.5	0.458333	0.44	0.4	0.692308	0.538462	0.44	0.428571	0.421053	0.425	0.410256	0.447368	0.4	0.358974	0.428571	0.444444	0.461538	0.378378	0.384615	0.351351	0.342105	0.45	0.351351	0.410256	0.411765	0.388889	0.4	0.216216	0.230769	0.157895	0.184211	0.125	0.296296
Osmunda_cinnamomea	0.571429	0.642857	0.642857	0.592593	0.444444	0.444444	0.580645	0.5	0.472222	0.45	0.473684	0.515151	0.529412	0.4375	0.40625	0.483871	0.478261	0.434783	0.333333	0.382353	0.68	0.56	0.416667	0.35	0.459459	0.384615	0.473684	0.486486	0.384615	0.394737	0.411765	0.428571	0.421053	0.444444	0.447368	0.444444	0.405405	0.410256	0.444444	0.421053	0.393939	0.371429	0.333333	0.222222	0.315789	0.189189	0.189189	0.15625	0.259259
Osmunda_claytoniana	0.586207	0.655172	0.62069	0.571429	0.428571	0.368421	0.5	0.4	0.405405	0.380952	0.4	0.411765	0.485714	0.5	0.454545	0.5	0.458333	0.375	0.36	0.457143	0.730769	0.538462	0.44	0.47619	0.368421	0.45	0.410256	0.394737	0.425	0.333333	0.4	0.416667	0.461538	0.378378	0.435897	0.405405	0.394737	0.45	0.405405	0.461538	0.352941	0.416667	0.48	0.135135	0.205128	0.157895	0.157895	0.0625	0.185185
Osmunda_banksiifolia	0.517241	0.517241	0.482759	0.535714	0.5	0.421053	0.46875	0.4	0.472222	0.380952	0.45	0.411765	0.470588	0.483871	0.424242	0.5625	0.333333	0.291667	0.44	0.4	0.730769	0.576923	0.36	0.380952	0.324324	0.410256	0.307692	0.351351	0.384615	0.315789	0.342857	0.361111	0.410256	0.324324	0.333333	0.27027	0.289474	0.487179	0.351351	0.384615	0.441176	0.277778	0.4	0.216216	0.128205	0.216216	0.189189	0.25	0.259259
Osmunda_bromeliifolia	0.517241	0.517241	0.482759	0.571429	0.5	0.473684	0.5	0.4	0.432432	0.428571	0.5	0.5	0.457143	0.5	0.515151	0.59375	0.333333	0.291667	0.48	0.457143	0.730769	0.538462	0.4	0.380952	0.315789	0.375	0.333333	0.342105	0.35	0.282051	0.371429	0.388889	0.435897	0.378378	0.358974	0.324324	0.315789	0.45	0.378378	0.410256	0.470588	0.361111	0.44	0.27027	0.205128	0.184211	0.184211	0.25	0.333333
Osmunda_javanica	0.551724	0.551724	0.517241	0.571429	0.464286	0.421053	0.5	0.45	0.459459	0.380952	0.45	0.441176	0.457143	0.46875	0.515151	0.5625	0.375	0.333333	0.48	0.457143	0.692308	0.538462	0.4	0.380952	0.342105	0.375	0.358974	0.368421	0.35	0.25641	0.342857	0.361111	0.410256	0.351351	0.333333	0.297297	0.289474	0.425	0.351351	0.384615	0.441176	0.333333	0.36	0.27027	0.230769	0.157895	0.184211	0.21875	0.333333
Osmunda_vachellii	0.551724	0.551724	0.517241	0.607143	0.5	0.473684	0.5	0.4	0.527778	0.428571	0.5	0.441176	0.5	0.516129	0.515151	0.59375	0.375	0.333333	0.52	0.485714	0.730769	0.576923	0.44	0.380952	0.378378	0.435897	0.358974	0.405405	0.410256	0.315789	0.342857	0.361111	0.410256	0.351351	0.333333	0.297297	0.289474	0.487179	0.351351	0.384615	0.441176	0.333333	0.44	0.27027	0.230769	0.216216	0.243243	0.25	0.333333
Osmunda_japonica	0.586207	0.655172	0.62069	0.571429	0.428571	0.315789	0.5	0.4	0.459459	0.333333	0.35	0.441176	0.485714	0.4375	0.393939	0.4375	0.416667	0.333333	0.32	0.457143	0.769231	0.576923	0.44	0.47619	0.342105	0.45	0.435897	0.447368	0.475	0.384615	0.4	0.416667	0.461538	0.459459	0.435897	0.405405	0.394737	0.475	0.405405	0.487179	0.470588	0.361111	0.48	0.135135	0.230769	0.131579	0.105263	0.125	0.148148
Osmunda_lancea	0.586207	0.655172	0.62069	0.571429	0.392857	0.315789	0.46875	0.35	0.405405	0.333333	0.35	0.441176	0.485714	0.4375	0.393939	0.4375	0.416667	0.333333	0.32	0.457143	0.769231	0.538462	0.44	0.47619	0.342105	0.425	0.410256	0.447368	0.45	0.333333	0.371429	0.388889	0.435897	0.432432	0.410256	0.378378	0.368421	0.45	0.378378	0.461538	0.411765	0.361111	0.48	0.135135	0.230769	0.0789474	0.0789474	0.0625	0.148148
Osmunda_regalis	0.586207	0.62069	0.586207	0.571429	0.428571	0.315789	0.46875	0.35	0.432432	0.333333	0.35	0.411765	0.457143	0.46875	0.424242	0.4375	0.416667	0.333333	0.36	0.428571	0.730769	0.576923	0.48	0.380952	0.342105	0.4	0.461538	0.421053	0.425	0.358974	0.342857	0.361111	0.384615	0.378378	0.410256	0.378378	0.368421	0.425	0.405405	0.461538	0.441176	0.305556	0.4	0.135135	0.230769	0.157895	0.131579	0.15625	0.148148
Leptopteris_fraseri	0.62069	0.689655	0.655172	0.607143	0.464286	0.368421	0.53125	0.35	0.5	0.428571	0.4	0.470588	0.529412	0.451613	0.363636	0.46875	0.458333	0.375	0.36	0.457143	0.730769	0.615385	0.44	0.47619	0.459459	0.512821	0.461538	0.513514	0.512821	0.447368	0.428571	0.444444	0.487179	0.486486	0.487179	0.459459	0.447368	0.512821	0.459459	0.487179	0.411765	0.388889	0.48	0.189189	0.307692	0.189189	0.189189	0.09375	0.222222
Leptopteris_hymenophylloides	0.607143	0.678571	0.678571	0.62963	0.407407	0.388889	0.548387	0.4	0.444444	0.45	0.421053	0.515151	0.5	0.4375	0.40625	0.451613	0.434783	0.391304	0.333333	0.441176	0.72	0.56	0.458333	0.45	0.432432	0.461538	0.473684	0.486486	0.461538	0.394737	0.441176	0.457143	0.5	0.5	0.5	0.472222	0.459459	0.487179	0.472222	0.5	0.424242	0.428571	0.458333	0.222222	0.342105	0.135135	0.162162	0.0625	0.259259
Leptopteris_wilkesiana	0.571429	0.642857	0.642857	0.592593	0.37037	0.388889	0.516129	0.35	0.416667	0.45	0.421053	0.515151	0.470588	0.40625	0.375	0.419355	0.391304	0.347826	0.291667	0.411765	0.68	0.52	0.5	0.45	0.405405	0.435897	0.447368	0.459459	0.435897	0.368421	0.411765	0.428571	0.473684	0.472222	0.473684	0.444444	0.486486	0.461538	0.444444	0.473684	0.393939	0.4	0.458333	0.194444	0.315789	0.162162	0.189189	0.03125	0.296296
Leptopteris_superba	0.607143	0.678571	0.678571	0.62963	0.407407	0.388889	0.548387	0.4	0.444444	0.45	0.421053	0.515151	0.5	0.4375	0.40625	0.451613	0.434783	0.391304	0.333333	0.441176	0.72	0.56	0.458333	0.45	0.432432	0.461538	0.473684	0.486486	0.461538	0.394737	0.441176	0.457143	0.5	0.5	0.5	0.472222	0.459459	0.487179	0.472222	0.5	0.424242	0.428571	0.458333	0.222222	0.342105	0.135135	0.162162	0.0625	0.259259
Todea_barbara	0.5	0.571429	0.571429	0.518519	0.481481	0.444444	0.580645	0.5	0.571429	0.45	0.473684	0.424242	0.575758	0.483871	0.4375	0.548387	0.478261	0.478261	0.416667	0.323529	0.6	0.52	0.375	0.4	0.527778	0.526316	0.473684	0.527778	0.473684	0.459459	0.470588	0.485714	0.5	0.416667	0.447368	0.388889	0.405405	0.552632	0.416667	0.447368	0.424242	0.371429	0.375	0.277778	0.236842	0.25	0.277778	0.15625	0.333333
[truncated: 76 more columns]
